# Supplementary material
Source: PubMed Central journal article supplement (PMC5310124)
Supplement: mmc1.pdf [file mmc1.pdf]

**e-Appendix 1.**
**Supplementary Methods**
**Search Strategy**

A health sciences librarian ran extensive literature searches in MEDLINE via Ovid, Cochrane Central Register of Controlled Trials via Wiley (CENTRAL), EMBASE via Wiley, Web of Science, CINAHL via EBSCO, and ClinicalTrials.gov during June – July 2015. No filters for date or language were used, however the Randomized Controlled Trials (From Scottish Intercollegiate Guidelines Network <http://www.sign.ac.uk/methodology/filters.html#random>) was applied to the Ovid MEDLINE search and modified for all other databases with the exception of EMBASE. For EMBASE, a filter described in the Cochrane Handbook for Systematic Reviews of Interventions was utilized (Lefebvre C, Manheimer E, Glanville J. Chapter 6: Searching for studies. In: Higgins J, Green S (editors). Cochrane Handbook for Systematic Reviews of Interventions. Version 5.1.0 (updated March 2011). The Cochrane Collaboration, 2011. Available from [www.cochrane-handbook.org](http://www.cochrane-handbook.org) ). Duplicates and pre-1990 studies were removed using EndNote. Full search strategies are included in the appendix.

**Ovid MEDLINE(R) In-Process & Other Non-Indexed Citations and Ovid MEDLINE(R) 1946 to Present** (Run on June 23, 2015, 3542 results. Rerun on March 2, 2016, 3653 Results)

| #  | Searches                               | Results | Search Type |
|----|----------------------------------------|---------|-------------|
| 1  | exp Hypertension, Pulmonary/           | 27061   | Advanced    |
| 2  | (pulmonary adj3 hypertension).tw.      | 32741   | Advanced    |
| 3  | PAH.tw.                                | 15270   | Advanced    |
| 4  | or/1-3                                 | 50829   | Advanced    |
| 5  | Randomized Controlled Trials as Topic/ | 98368   | Advanced    |
| 6  | randomized controlled trial/           | 397829  | Advanced    |
| 7  | Random Allocation/                     | 83781   | Advanced    |
| 8  | Double Blind Method/                   | 130918  | Advanced    |
| 9  | Single Blind Method/                   | 20630   | Advanced    |
| 10 | clinical trial/                        | 495717  | Advanced    |
| 11 | clinical trial, phase i.pt.            | 15315   | Advanced    |
| 12 | clinical trial, phase ii.pt.           | 24644   | Advanced    |
| 13 | clinical trial, phase iii.pt.          | 10149   | Advanced    |
| 14 | clinical trial, phase iv.pt.           | 1034    | Advanced    |
| 15 | controlled clinical trial.pt.          | 89715   | Advanced    |
| 16 | randomized controlled trial.pt.        | 397829  | Advanced    |

|    |                                                                           |         |          |
|----|---------------------------------------------------------------------------|---------|----------|
| 17 | multicenter study.pt.                                                     | 188398  | Advanced |
| 18 | clinical trial.pt.                                                        | 495717  | Advanced |
| 19 | exp Clinical Trials as topic/                                             | 290521  | Advanced |
| 20 | or/5-19                                                                   | 1084627 | Advanced |
| 21 | (clinical adj trial\$.tw.                                                 | 238487  | Advanced |
| 22 | ((singl\$ or doubl\$ or treb\$ or tripl\$) adj (blind\$3 or mask\$3)).tw. | 136764  | Advanced |
| 23 | PLACEBOS/                                                                 | 33038   | Advanced |
| 24 | placebo\$.tw.                                                             | 168958  | Advanced |
| 25 | randomly allocated.tw.                                                    | 18726   | Advanced |
| 26 | (allocated adj2 random\$.tw.                                              | 21411   | Advanced |
| 27 | (randomised controlled trial* or randomized controlled trial*).tw.        | 94148   | Advanced |
| 28 | or/21-27                                                                  | 520039  | Advanced |
| 29 | 20 or 28                                                                  | 1274362 | Advanced |
| 30 | case report.tw.                                                           | 220376  | Advanced |
| 31 | letter/                                                                   | 883670  | Advanced |
| 32 | historical article/                                                       | 317457  | Advanced |
| 33 | or/30-32                                                                  | 1409280 | Advanced |
| 34 | 29 not 33                                                                 | 1242943 | Advanced |
| 35 | 4 and 34                                                                  | 3542    | Advanced |
| 36 | ("19155250" or "23755974" or "22691882" or "24371842" or "25173912").ui.  | 5       | Advanced |
| 37 | 36 not 35                                                                 | 1       | Advanced |

**CINAHL** (Run on June 23, 2015, 613 results. Rerun on March 2, 2016, 660 results.)

1. (MH "Hypertension, Pulmonary+")
2. pulmonary N3 hypertension
3. PAH
4. S1 OR S2 OR S3
5. (MH "Clinical Trials+")
6. PT Clinical trial
7. clinic\* n1 trial\*
8. (tripl\* n1 blind\*) or (tripl\* n1 mask\*)
9. (doubl\* n1 blind\*) or (doubl\* n1 mask\*)
10. (singl\* n1 blind\*) or (singl\* n1 mask\*)
11. randomi\* control\* trial\*
12. MH "Random Assignment"
13. random\* allocat\*
14. placebo\*
15. (MH "Placebos")
16. (MH "Quantitative Studies")
17. allocat\* random\*

18. S5 OR S6 OR S7 OR S8 OR S9 OR S10 OR S11 OR S12 OR S13 OR S14 OR S15 OR S16 S17
19. S4 AND S18

**CDSR, DARE, and CENTRAL via Wiley** (run on June 23, 2015, 122 results. Rerun on March 3, 2016, 117 results.[NOTE: CDSR (0 results) and DARE (133) were only run on March 3, 2016.]

1. MeSH descriptor: [Hypertension, Pulmonary] explode all trees
2. pulmonary near/3 hypertension:ti,ab,kw (Word variations have been searched)
3. PAH:ti,ab,kw (Word variations have been searched)
4. #1 or #2 or #3
5. MeSH descriptor: [Clinical Trial] explode all trees
6. clinic\* near/1 trial\*:ti,ab,kw (Word variations have been searched)
7. (tripl\* near/1 blind\*) or (tripl\* near/1 mask\*):ti,ab,kw (Word variations have been searched)
8. (doubl\* near/1 blind\*) or (doubl\* near/1 mask\*):ti,ab,kw (Word variations have been searched)
9. (singl\* near/1 blind\*) or (singl\* near/1 mask\*):ti,ab,kw (Word variations have been searched)
10. randomi\* control\* trial\*:ti,ab,kw (Word variations have been searched)
11. MeSH descriptor: [Random Allocation] explode all trees
12. MeSH descriptor: [Randomized Controlled Trials as Topic] explode all trees
13. MeSH descriptor: [Double-Blind Method] explode all trees
14. MeSH descriptor: [Single-Blind Method] explode all trees
15. MeSH descriptor: [Clinical Trials as Topic] explode all trees
16. MeSH descriptor: [Placebos] explode all trees
17. randomly allocated:ti,ab,kw (Word variations have been searched)
18. placebo\*:ti,ab,kw (Word variations have been searched)
19. allocated near/2 random\*:ti,ab,kw (Word variations have been searched)
20. randomised controlled trial\* or randomized controlled trial\*:ti,ab,kw (Word variations have been searched)
21. #5 or #6 or #7 or #8 or #9 or #10 or #11 or #12 or #13 or #14 or #15 or #16 or #17 or #18 or #19 or #20
22. #5 AND #21

**Web of Science** (All terms run as topic. Run on June 23, 2015, 2561 results. Rerun on March 3, 2016, 2754 results.)

1. pulmonary Near/3 hypertension
2. PAH
3. #1 OR #2
4. clinical Near/3 trial\*
5. ((singl\* or doubl\* or treb\* or tripl\*) Near/3 (blind\* or mask\*))
6. Placebo\*
7. "randomly allocated"
8. allocated Near/2 random\*
9. "randomised controlled trial\*" or "randomized controlled trial\*"
10. #4 OR #5 OR #6 OR #7 OR #8 OR #9
11. #3 AND #10

**Embase** (Run on July 21, 2015, 6481 results. Rerun on March 3, 2016, 8494 results.)

1. 'pulmonary hypertension'/exp
2. pulmonary NEAR/3 hypertension
3. PAH
4. #1 OR #2 OR #3
5. 'crossover procedure':de OR 'double-blind procedure':de OR 'randomized controlled trial':de OR 'single-blind procedure':de OR (random\* OR factorial\* OR crossover\* OR cross NEXT/1 over\* OR placebo\* OR doubl\* NEAR/1 blind\* OR singl\* NEAR/1 blind\* OR assign\* OR allocat\* OR volunteer\*):de,ab,ti
6. #4 AND #5

**Clinicaltrials.gov** (run on July 21, 2015, 390, [306 after removing duplicates]. Rerun on March 3, 2016, 425 results [332 after removing duplicates].)

"Pulmonary arterial hypertension" AND random (145 studies. Rerun on March 3, 2016, 156 studies.)

"Pulmonary hypertension" AND random (245 studies. Rerun on March 3, 2016, 269 studies.)

### **Study exclusion criteria**

We excluded (a) observational studies, (b) trials with a cross-over design since the adequate washout period for medications is not well-defined for PAH therapies, (c) non-FDA approved or investigational therapies including sitaxsentan, beraprost, imatinib and vardenafil, (d) conventional therapy not specific to PAH - calcium channel blockers, anticoagulants, diuretics and other heart failure therapy, (e) other WHO groups of pulmonary hypertension, where data for group 1 pulmonary hypertension was not separately reported, (f) trials studying exclusively patients with sickle cell disease, congenital heart disease or Eisenmenger's syndrome, and (g) trials that did not report any of our selected efficacy outcomes.

### **Excluded RCTs with reasons for exclusion**

Twelve RCTs were excluded because they studied non-FDA approved treatments<sup>1-12</sup>. Eleven RCTs were excluded because they studied exclusively patients with Eisenmenger's syndrome<sup>13-19</sup>, congenital heart disease<sup>20</sup>, sickle cell disease<sup>21</sup> or included only children<sup>22</sup> or pregnant females<sup>23</sup> in the study. Two RCTs including patients with pulmonary hypertension other than Group I were excluded because they did not report separately data for Group I PAH patients.<sup>24,25</sup> Three other RCTs were excluded for lack of appropriate comparator group (two different doses of the same medication were studied in the two arms of the study).<sup>26-28</sup> The details are presented in supplementary Table 1.

### **Data Abstraction Protocol**

Data was abstracted for the following characteristics:

- (a) study characteristics – primary author, year of publication, geographic location of the study, single versus multi center, duration of follow-up, total number of patients in intervention and comparator group

- (b) patient characteristics – age, sex
- (c) disease characteristics – etiology of PAH, baseline 6MWD, baseline NYHA/ WHO functional class
- (d) treatment characteristics –intervention and comparator treatment, percentage of patients on concomitant background therapy, type of background therapy
- (e) outcome assessment – mortality, change in 6MWD from baseline, proportion of subjects with improvement in NYHA/ WHO functional class, proportion of subjects hospitalized for any reason
- (f) adverse effects – proportion of patients with serious adverse events requiring medication discontinuation.

### **Outcome assessment**

A hierarchical approach was used for timing of outcome assessment. A 16 ( $\pm 4$ ) week follow-up period was used as the preferential time-point for outcome assessment in our study; when outcomes were reported at multiple periods of follow up, the time-point closest to 16 weeks was selected for all outcomes. Intention-to-treat analysis was performed for all outcomes, that is, all randomized patients were included in the analysis. In our primary analysis, we used study reported event rates for categorical outcomes and the last-observation carried forward (LOCF) data for the continuous 6MWD. For Phase III trials reporting data for multiple doses of the same medication, we used the FDA approved dose. For Phase-II trials reporting the same, we used the following approach in order of preference depending on availability 1) pooled data for all patients with multiple doses combined, 2) data for the most commonly used dose across all trials of that agent or 3) data for the FDA approved dose.

### **Statistical analysis**

Direct meta-analysis was performed for all treatment comparisons using a DerSimonian-Laird random effects approach, which incorporates within- and between-study heterogeneity to estimate pooled relative risk (RR) and 95% confidence intervals (CI) for each comparison. For the continuous outcome (6MWD), pooled weighted mean difference and its 95% CI was estimated. We performed network meta-analyses for all available interventions using a multivariate random-effects meta-regression developed by Ian White<sup>29</sup>. For this analysis, we used a “consistency” approach which assumes that study design does not affect estimates. In this approach, it is assumed that the estimate for a comparison between two agents, A and B, does not differ by trial design (A-B or one with a third agent, C, A-B-C). To examine the applicability of this approach, we repeated these analysis using the design-by-treatment approach suggested by Higgins et al, which includes study design as an additional covariate in the model (“inconsistency” model),<sup>30</sup> and a Wald test for inconsistency was performed.

We calculated a point estimate from the network along with a 95% confidence intervals from the frequency distribution of the estimate. This approach is similar to a Bayesian model with non-informative priors (when no assumptions are made about treatment effect of these drugs from data external to the trials included in this systematic review). The details of the procedure have been reported previously.<sup>31</sup>

### **Ranking of agents**

We ranked drugs in order of their efficacy and tolerability using the surface under the cumulative ranking (SUCRA).<sup>32</sup> We estimated the highest cumulative rank for improving efficacy outcomes, and for being most safe for the adverse event outcome, by comparing each against an imaginary agent that is always the highest ranked, with a SUCRA of 1 and another agent that is always lowest ranked with SUCRA of 0. However, this information is provided only as an additional piece evidence for the readership and given the uncertainty in ranking estimates,<sup>33</sup> we do not use SUCRA estimates in deriving any of our study conclusions.

### **Sensitivity analyses**

We performed sensitivity analyses to assess the robustness of our findings. First, to allow for sufficient follow up period, we included trials which with a follow up of at least 12 weeks. Second, to limit the impact of temporal variation in trial design, we repeated the analysis limiting to trials published after the year 2000. Finally, we repeated our analysis for trials where the less than 20% of included participants were receiving background therapy with another agent at the beginning of the trial. Results of these analyses are presented in e-Table 5.

### **Quality of Evidence**

We followed the GRADE framework to rate the quality of evidence of estimates derived from network meta-analysis for efficacy outcomes – clinical worsening and improvement in functional class.<sup>16</sup> In this approach,

(A) Results from the meta-analysis of randomized clinical trials starts at the highest quality of evidence (of the four levels – high-, moderate-, low- and very low-quality evidence) and is subsequently rated down for any of the five criteria: (i) within-study risk of bias (methodological quality), (ii) indirectness of evidence (includes consideration for head-to-head trials, representativeness of study populations, nature of interventions/outcomes) (iii) heterogeneity between direct and indirect estimates, (iv) imprecision of effect estimates (width of confidence intervals, particularly if includes the null) and (v) risk of publication bias. The risk of a particular bias is rated as 'severe' or 'very severe', and evidence rating is subsequently downgraded by 1 (severe) or 2 (very-severe) categories accordingly.

(B) The rating of indirect estimates starts at the lowest rating of the two pairwise estimates that contribute as first-order loops (comparison involving a single additional intervention, such as placebo) to the indirect estimate, but can be rated down further for imprecision or intransitivity

(dissimilarity between studies in terms of clinical or methodological characteristics). If direct and indirect estimates were similar (i.e. coherent), then the higher of their rating can be assigned to the network meta-analysis estimates. The interpretation of GRADE categories is described in e-Table 3.

## **SUPPLEMENTAL RESULTS**

### **Efficacy outcomes: Clinical worsening, hospitalization and mortality**

#### *Direct meta-analysis*

The primary outcome, clinical worsening was available in 20 RCTs with 22 direct comparisons (e-Figure 3). Compared to placebo, ERA (RR 0.51, 95% CI 0.35, 0.75), PDE5i (RR 0.35, 95% CI 0.22, 0.57), riociguat (RR 0.19, 95% CI 0.05, 0.69) and selexipag (RR 0.65, 95% CI 0.55, 0.77) were associated with reduction in clinical worsening ( $I^2$ : 0-64%). However, data for both riociguat and selexipag were available from only one RCT each. The combination of ERA+PDE5i was associated with reduced clinical worsening compared to both ERA (RR 0.53, 95% CI 0.37, 0.76) and PDE5i (RR 0.65, 95% CI 0.44, 0.95) in the single study for these comparisons. For the outcome of PAH-related hospitalization (e-Figure 4), compared to placebo, selexipag was associated with reduced hospitalizations (RR 0.73, 95% CI 0.56, 0.95). The combination of ERA+PDE5i was associated with lower hospitalization compared to ERA (RR 0.28, 95% CI 0.13, 0.58) and to PDE5i (RR 0.40, 95% CI 0.18, 0.90), but ERA or PDE5i were not significant in placebo comparisons. All-cause mortality was reported by all included studies. For this outcome, the pooled RR for all direct placebo comparisons was lower than 1 for most comparisons; however, none of these reached statistical significance ( $I^2$ : 0-28%, e-Figure 5).

### **Efficacy outcomes: Functional status**

#### *Direct meta-analysis*

Improvement in NYHA/WHO functional class was reported in 23 RCTs with 25 comparisons (e-Figure 6). Compared to placebo, ERA (RR 1.56, 95% CI 1.23, 1.97), IV/SC prostanoids (RR 6.73, 95% CI 1.98, 22.90) and selexipag (RR 1.55, 95% CI 1.11, 2.18) were efficacious in improving the functional status by at least one NYHA/WHO class ( $I^2$ : 0-64%). For the continuous outcome of 6MWD, most active agents were associated with significant improvements in 6MWD over placebo ( $I^2$ : 0-86%) with varying magnitudes of weighted mean difference [WMD] – 28.5m with ERA, 27.2m with PDE5i, 13.3m for PO/INH prostanoids, 31.4m with IV/SC prostanoids, 30.3m with riociguat and 14.4m with selexipag (e-Figure 7).

### **Adverse events leading to discontinuation**

#### *Direct meta-analysis*

The rates of adverse-event related medication discontinuation were examined as a marker for tolerability, with lower discontinuation rates suggesting higher tolerability. 26 RCTs reported data

*Online supplements are not copyedited prior to posting and the author(s) take full responsibility for the accuracy of all data.*

on this outcome. Compared to placebo, PO/INH prostanoids (6 RCTs; RR 2.96, 95% CI 1.84, 4.77,  $I^2= 0\%$ ) and selexipag (1 RCT, RR 2.01, 95 % CI: 1.40, 2.87) were more likely to be discontinued. None of the other agents differed significantly in available comparisons against each other or placebo (e-Figure 8).



**e-Table 1. Randomized controlled trials excluded from the meta-analysis with reasons for exclusion.**

| <b>Author, Year (Study name)</b>      | <b>Reason for Exclusion</b>                                                                                                            |
|---------------------------------------|----------------------------------------------------------------------------------------------------------------------------------------|
| Sun, 2014 <sup>23</sup>               | Patients: Pregnant females only                                                                                                        |
| Chin, 2014 (EPITOME-1) <sup>26</sup>  | Intervention: Two different doses of epoprostenol compared in the two arms of the RCT                                                  |
| Cha, 2013 (EIGER) <sup>13</sup>       | Patients: Exclusively patients with Eisenmenger syndrome                                                                               |
| Fukumoto, 2013 <sup>1</sup>           | Intervention: Non FDA approved drug (AT-877ER)                                                                                         |
| Hoeper, 2013 <sup>34</sup>            | Intervention: Non FDA approved therapy (Imatinib)                                                                                      |
| Van de Bruaene A, 2013 <sup>20</sup>  | Patients: Congenital heart disease with late ASD closure                                                                               |
| Badesch, 2012 (ARIES 3) <sup>24</sup> | Patients: Included other classes of PH with data not separately reported for PAH                                                       |
| Barst, 2012 <sup>22</sup>             | Patients: Children (all subjects less than 17 years of age)                                                                            |
| Kaya, 2012 <sup>14</sup>              | Patients: Exclusively patients with Eisenmenger syndrome                                                                               |
| Sandoval, 2012 <sup>3</sup>           | Intervention: Non FDA approved drug (Sitaxsentan)                                                                                      |
| Zeng, 2012 <sup>4</sup>               | Intervention: Non FDA approved drug (Atorvastatin)<br>Patients: Included other classes of PH with data not separately reported for PAH |
| Kawut, 2011 (ASA-STAT) <sup>5</sup>   | Intervention: Non FDA approved therapies (Aspirin and Statin)                                                                          |
| Mukhopadhyay, 2011 <sup>15</sup>      | Patients: Exclusively patients with Eisenmenger syndrome                                                                               |
| Barst, 2010 (ASSET) <sup>21</sup>     | Patients: Exclusively patients with sickle cell disease                                                                                |
| Ghofrani, 2010 <sup>6</sup>           | Intervention: Non FDA approved drug (Imatinib)                                                                                         |
| Iversen, 2010 <sup>16</sup>           | Patients: Exclusively patients with Eisenmenger syndrome                                                                               |
| Wilkins, 2010 <sup>12</sup>           | Intervention: Non FDA approved drug (Simvastatin)                                                                                      |
| Bharani, 2007 <sup>17</sup>           | Patients: Exclusively patients with Eisenmenger syndrome                                                                               |
| Chau, 2007 <sup>18</sup>              | Patients: Exclusively patients with Eisenmenger syndrome                                                                               |
| Rubensfire, 2007 <sup>28</sup>        | Intervention: Studied transition from Epoprostenol to treprostinil                                                                     |
| Wang, 2007 <sup>7</sup>               | Intervention: Non pharmacologic treatment studied (endothelial progenitor cell transplant)                                             |
| Singh, 2006 <sup>35</sup>             | Design: Cross-over                                                                                                                     |
| Channick, 2006 <sup>27</sup>          | Intervention: Two different doses of the same drug compared in the two arms of the RCT (Inhaled treprostinil)                          |
| Galie, 2006 (BREATHE-5) <sup>19</sup> | Patients: Exclusively patients with Eisenmenger syndrome                                                                               |
| Barst, 2006 (STRIDE-2) <sup>8</sup>   | Intervention: Non FDA approved drug (Sitaxsentan)                                                                                      |
| Sastry, 2004 <sup>36</sup>            | Design: Cross-over                                                                                                                     |
| Barst, 2004 (STRIDE-1) <sup>9</sup>   | Intervention: Non FDA approved drug (Sitaxsentan)                                                                                      |
| Barst, 2003 <sup>10</sup>             | Intervention: Non FDA approved therapy (Beraprost)                                                                                     |
| Galie, 2002 <sup>11</sup>             | Intervention: Non FDA approved therapy (Beraprost)                                                                                     |
| Ghofrani, 2002 <sup>25</sup>          | Patients: Included other classes of PH with data not separately reported for PAH                                                       |

**e-Table 2. Definition of Clinical Worsening**

| <b>Study author, year (Study name)</b> | <b>Definition of Clinical Worsening</b>                                                                                                                                                                                                                                                                                                                                                                                                                                                                                                                                                                     |
|----------------------------------------|-------------------------------------------------------------------------------------------------------------------------------------------------------------------------------------------------------------------------------------------------------------------------------------------------------------------------------------------------------------------------------------------------------------------------------------------------------------------------------------------------------------------------------------------------------------------------------------------------------------|
| Galie, 2015 (AMBITION)                 | All-cause death + hospitalization for worsening PAH + disease progression (decrease of $\geq 15\%$ from baseline 6MWD combined with WHO FC III or IV symptoms at two consecutive visits separated by at least 14 days) or unsatisfactory long term clinical response (any decrease from baseline in 6MWD at two consecutive clinic visits after baseline separated by at least 14 days, and WHO FC III symptoms assessed at two clinic visits separated by at least 6 months).                                                                                                                              |
| McLaughlin, 2014 (COMPASS-2)           | All-cause death + hospitalization for worsening PAH + start of intravenous prostanoid therapy + atrial septostomy + lung transplantation + worsening PAH defined as – 1) moderate or marked worsening of PAH symptoms on the PGSA together with the initiation of a subcutaneous or inhaled prostanoid or use of open-label bosentan or 2) no change or mild worsening of PAH symptoms accompanied by a decrease in 6MWD by $\geq 20\%$ from the previous visit or $\geq 30\%$ from the baseline visit, together with the initiation of a subcutaneous or inhaled prostanoid or use of open-label Bosentan. |
| Galie, 2008 (EARLY)                    | All-cause death (during the treatment period or as the outcome of a treatment-emergent adverse event that led to permanent discontinuation of study treatment) + hospitalization due to PAH complications + symptomatic progression of PAH (presence of one of the following: appearance or worsening of right heart failure; decrease of $\geq 10\%$ from baseline in two 6MWD done 2 weeks or more apart; or $\geq 5\%$ decrease from baseline in two 6MWD done 2 weeks or more apart associated with a 2-point or greater increase in Borg dyspnea index).                                               |
| Galie, 2008 (ARIES 1)                  | All-cause death + lung transplantation + hospitalization for PAH + atrial septostomy + study withdrawal because of the addition of other PAH medications, or early escape criteria [presence of 2 of the following criteria: (1) a decrease of $\geq 20\%$ in the 6MWD, (2) an increase of $\geq 1$ WHO FC, (3) worsening right ventricular failure (as indicated by increased jugular venous pressure, new/worsening hepatomegaly, ascites, or peripheral edema), (4) rapidly progressing hepatic or renal failure, and (5) refractory systolic hypotension (systolic blood pressure $\leq 85$ mm Hg)].    |
| Galie, 2008 (ARIES 2)                  | All-cause death + lung transplantation + hospitalization for PAH + atrial septostomy + study withdrawal because of the addition of other PAH medications, or early escape criteria [presence of 2 of the following criteria: (1) a decrease of $\geq 20\%$ in the 6MWD, (2) an increase of $\geq 1$ WHO FC, (3) worsening right ventricular failure (as indicated by increased jugular venous pressure, new/worsening hepatomegaly, ascites, or peripheral edema), (4) rapidly progressing hepatic or renal failure, and (5) refractory systolic hypotension (systolic blood pressure $\leq 85$ mm Hg)].    |
| Rubin, 2002 (BREATHE-I)                | All-cause death + lung transplantation + hospitalization for pulmonary hypertension + lack of clinical improvement or worsening leading to discontinuation + need for epoprostenol therapy + atrial septostomy                                                                                                                                                                                                                                                                                                                                                                                              |
| Channick, 2001                         | Right ventricular failure or aggravated PAH                                                                                                                                                                                                                                                                                                                                                                                                                                                                                                                                                                 |
| Pulido, 2013 (SERAPHIN)                | All-cause death upto the end of treatment period + lung transplantation + atrial septostomy + worsening of pulmonary arterial hypertension (occurrence of all three of the following: a decrease in 6MWD of $\geq 15\%$ from baseline, confirmed by a second 6-minute walk test performed on a different day within 2 weeks; worsening of symptoms of PAH; and the need for additional treatment of PAH) + initiation of treatment with intravenous or subcutaneous prostanoids.                                                                                                                            |



# CHEST® Online Supplement

|                              |                                                                                                                                                                                                                                                                                                                                                                                                                                                                                                                                                                                                                                                                                                                                       |
|------------------------------|---------------------------------------------------------------------------------------------------------------------------------------------------------------------------------------------------------------------------------------------------------------------------------------------------------------------------------------------------------------------------------------------------------------------------------------------------------------------------------------------------------------------------------------------------------------------------------------------------------------------------------------------------------------------------------------------------------------------------------------|
| Zhuang, 2014                 | All-cause death + transplantation + arterial septostomy + hospitalization due to worsening PAH + initiation of new therapy or worsening FC by week 16.                                                                                                                                                                                                                                                                                                                                                                                                                                                                                                                                                                                |
| Galie, 2009 (PHIRST)         | All-cause death + lung or heart-lung transplantation + atrial septostomy + hospitalization due to worsening PAH + initiation of new PAH approved therapy + worsening WHO FC.                                                                                                                                                                                                                                                                                                                                                                                                                                                                                                                                                          |
| Simonneau, 2008 (PACES)      | All-cause death + lung transplantation + hospitalization due to PAH + initiation of bosentan therapy + change in epoprostenol dose of $\geq 10\%$ due to clinical deterioration.                                                                                                                                                                                                                                                                                                                                                                                                                                                                                                                                                      |
| Galie, 2005 (SUPER)          | All-cause death + transplantation + hospitalization for PAH + initiation of additional therapies for PAH such as intravenous epoprostenol or oral bosentan.                                                                                                                                                                                                                                                                                                                                                                                                                                                                                                                                                                           |
| Jing, 2013 (FREEDOM-M)       | Cardiovascular death + transplantation + atrial septostomy + clinical deterioration [initiation of new, approved PAH-specific therapy (ERA, PDE5i, or prostacyclin) + either hospitalization for decompensated PAH or a $\geq 20\%$ decrease in 6MWD from baseline combined with worsening WHO FC].                                                                                                                                                                                                                                                                                                                                                                                                                                   |
| Tapson, 2013 (FREEDOM-C2)    | All-cause death + transplantation + atrial septostomy + hospitalization as a result of right side heart failure + initiation of parenteral prostacyclin therapy + decrease in 6MWD of $\geq 20\%$ from baseline (or too ill to walk) and the addition of an inhaled prostacyclin analog, ERA or PDE5i.                                                                                                                                                                                                                                                                                                                                                                                                                                |
| Tapson, 2012 (FREEDOM-C)     | All-cause death + transplantation + atrial septostomy + clinical deterioration defined as hospitalization related to PAH, 20% decrease in 6MWD from baseline and a decrease in World Health Organization [WHO] FC + initiation of a new PAH therapy                                                                                                                                                                                                                                                                                                                                                                                                                                                                                   |
| McLaughlin, 2010 (TRIUMPH-1) | Death + transplantation + hospital stay due to worsening PAH + initiation of additional approved PAH-specific therapy                                                                                                                                                                                                                                                                                                                                                                                                                                                                                                                                                                                                                 |
| McLaughlin, 2006 (STEP)      | Death due to PAH + hospitalization + early study discontinuation due to worsening PAH + initiation of new, chronic PAH-specific therapy + lung transplantation + atrial septostomy                                                                                                                                                                                                                                                                                                                                                                                                                                                                                                                                                    |
| Hooper, 2006 (COMBI)         | All-cause death + hospital admission for right heart failure + deterioration in FC or decrease in 6MWD by 20% from baseline or $< 150$ m                                                                                                                                                                                                                                                                                                                                                                                                                                                                                                                                                                                              |
| Ghofrani, 2013 (PATENT 1)    | All-cause death + heart or lung transplantation + atrial septostomy + hospitalization due to persistent worsening of PAH + start of new specific PAH treatment (ERAs, prostanoids, or PDE5i) or modification of a preexisting prostanoid treatment (i.e., increase in number of daily iloprost inhalations from six to nine, or increase of iloprost dosage from 2.5 to 5.0 $\mu\text{g}$ per inhalation, or start of an intravenous prostanoid) due to worsening pulmonary arterial hypertension + persistent decrease of $> 15\%$ from baseline or $> 30\%$ compared with the last study related measurement in 6MWD due to worsening PAH + persistent worsening of World Health Organization (WHO) FC due to deterioration of PAH. |
| Sitbon, 2016 (GRIPHON)       | All-cause death + PAH-related hospitalization + need for transplantation + need for septostomy + initiation of parenteral prostanoids therapy or long-term oxygen therapy + disease progression defined as decrease from baseline of at least 15% in the 6MWD (confirmed by means of a second test on a different day) accompanied by a worsening in WHO FC (for the patients with WHO FC II or III at baseline) or the need for additional treatment of PAH (for the patients with WHO FC III or IV at baseline).                                                                                                                                                                                                                    |

**e-Table 3. GRADE categories of quality of evidence**

| <b>GRADE quality of evidence</b> | <b>Interpretation</b>                                                                                                                        |
|----------------------------------|----------------------------------------------------------------------------------------------------------------------------------------------|
| High quality                     | Further research is <b>VERY UNLIKELY</b> to change our confidence in the estimate of effect                                                  |
| Moderate quality                 | Further research is <b>LIKELY</b> to have an impact on our confidence in the estimate of effect and <b>MAY</b> change the estimate           |
| Low quality                      | Further research is <b>VERY LIKELY</b> to have an impact on our confidence in estimate of effect and is <b>LIKELY</b> to change the estimate |
| Very low quality                 | Any estimate of effect is very uncertain                                                                                                     |

**e-Table 4. SUCRA rankings for all outcomes for the primary analysis**

| Pharmacologic intervention | Clinical Worsening | Hospitalization | Mortality | Improvement in functional class | 6MWD | Adverse events leading to discontinuation |
|----------------------------|--------------------|-----------------|-----------|---------------------------------|------|-------------------------------------------|
| Placebo                    | 0.03               | 0.15            | 0.28      | 0.04                            | 0.02 | 0.61                                      |
| ERA                        | 0.46               | 0.39            | 0.59      | 0.48                            | 0.69 | 0.57                                      |
| PDE5 inhibitor             | 0.68               | 0.57            | 0.56      | 0.45                            | 0.53 | 0.80                                      |
| PO/ INH Prostanoids        | 0.24               | 0.26            | 0.40      | 0.59                            | 0.26 | 0.09                                      |
| IV/ SC Prostanoids         | -                  | 0.51            | 0.73      | 0.99                            | 0.74 | 0.16                                      |
| Riociguat                  | 0.89               | 0.87            | 0.80      | 0.39                            | 0.48 | 0.92                                      |
| ERA + PDE5 inhibitor       | 0.86               | 0.86            | 0.58      | 0.60                            | 0.97 | 0.62                                      |
| Selexipag                  | 0.34               | 0.39            | 0.07      | 0.47                            | 0.32 | 0.24                                      |

SUCRA rankings for the primary analysis for all outcomes. The larger number represent the better agent for both efficacy and safety outcomes. ERA = endothelin receptor antagonist, PDE5 inhibitor = Phosphodiesterase inhibitor, PO/INH = Per oral/ Inhaled, IV/SC = Intravenous/ Subcutaneous, 6MWD = 6 – minute walk distance.

*Online supplements are not copyedited prior to posting and the author(s) take full responsibility for the accuracy of all data.*

**e-Table 5- Results of sensitivity analysis**

| Pharmacological intervention | Timing of outcome assessment (A) |                                             | Excluding trials published before 2000 (B) |                                             | *Excluding trials with >20% subjects on background therapy |
|------------------------------|----------------------------------|---------------------------------------------|--------------------------------------------|---------------------------------------------|------------------------------------------------------------|
|                              | Clinical Worsening RR (95% CI)   | Improvement in functional class RR (95% CI) | Clinical Worsening RR (95% CI)             | Improvement in functional class RR (95% CI) | Improvement in functional class RR (95% CI)                |
| ERA                          | 0.53 (0.36,0.78)                 | 1.56 (1.21,2.01)                            | 0.53 (0.36,0.78)                           | 1.56 (1.23,1.99)                            | 2.03 (1.32,3.10)                                           |
| PDE5i                        | 0.39 (0.24,0.62)                 | 1.53 (1.06,2.21)                            | 0.39 (0.24,0.62)                           | 1.52 (1.07,2.16)                            | 2.37 (1.17,4.79)                                           |
| PO/INH Prostanoids           | 0.75 (0.47,1.19)                 | 1.77 (0.99,3.19)                            | 0.75 (0.47,1.19)                           | 1.74 (0.99,3.05)                            | 3.00 (0.89,10.09)                                          |
| IV/SC Prostanoids            | -                                | 4.91 (1.88,12.80)                           | -                                          | 2.33 (0.75,7.30)                            | 5.20 (2.28,11.86)                                          |
| Riociguat                    | 0.19 (0.05,0.76)                 | 1.42 (0.74,2.69)                            | 0.19 (0.05,0.76)                           | 1.42 (0.77,2.62)                            | -                                                          |
| ERA + PDE5i                  | 0.27 (0.14,0.52)                 | 1.75 (1.04,2.96)                            | 0.27 (0.14,0.52)                           | 1.75 (1.07,2.85)                            | 2.48 (1.18,5.23)                                           |
| Selexipag                    | 0.65 (0.38,1.12)                 | 1.55 (0.89,2.69)                            | 0.65 (0.38,1.12)                           | 1.55 (0.93,2.60)                            | -                                                          |

Sensitivity analysis based on timing of outcome assessment including only trials that reported outcomes at 12+/- 4 weeks (A), excluding older trials published before 2000 (B), excluding trials where percentage of patients on PAH specific background therapy was >20% (C). The estimate for each intervention is represented against placebo and is derived from network meta-analysis combining both direct and indirect comparisons. Numbers in parentheses indicate 95% Confidence Intervals. ERA = Endothelin Receptor Antagonist, PDE5i = Phosphodiesterase 5 inhibitor, 6MWD = 6-minute walk distance, RR = Relative Risk, \*The number of trials in this subgroup was too few to perform network meta-analysis for the outcome of clinical worsening.

**e-Table 6. GRADE quality of evidence derived From Direct and Indirect Estimates and Network Meta-Analysis Informing on Comparative Efficacy of Pharmacological Strategies.**

| <b>Pharmacological Intervention</b> | <b>Direct- Functional Class</b> | <b>Direct- clinical worsening</b> | <b>Network- Functional Class</b> | <b>Network – Clinical worsening</b>                                          |
|-------------------------------------|---------------------------------|-----------------------------------|----------------------------------|------------------------------------------------------------------------------|
| <b>Compared with Placebo</b>        |                                 |                                   |                                  |                                                                              |
| ERA                                 | Moderate (indirectness)         | Moderate (indirectness)           | Moderate                         | Moderate                                                                     |
| PDE5i                               | Low (indirectness, imprecision) | Moderate (indirectness)           | Low                              | Moderate                                                                     |
| PO/ INH Prostacyclins               | Low (indirectness, imprecision) | Low (indirectness, imprecision)   | Low                              | Low                                                                          |
| IV/ SC Prostacyclins                | Moderate (risk of bias)         | -                                 | Moderate                         | -                                                                            |
| Riociguat                           | Low (indirectness, imprecision) | Moderate (indirectness)           | Low                              | Moderate                                                                     |
| ERA+ PDE5i                          | -                               | -                                 | Moderate                         | Moderate                                                                     |
| Selexipag                           | Moderate (indirectness)         | Moderate (indirectness)           | Moderate                         | Moderate                                                                     |
| <b>Compared with ERA</b>            |                                 |                                   |                                  |                                                                              |
| PDE5i                               | Low (very serious imprecision)  | Moderate (imprecision)            | Low                              | Low (rating down for imprecision)                                            |
| PO/ INH Prostacyclins               | -                               | -                                 | Low                              | Low                                                                          |
| IV/ SC Prostacyclins                | -                               | -                                 | Moderate                         | -                                                                            |
| Riociguat                           | -                               | -                                 | Low (favor ERA)                  | Very low (favoring riociguat, rated down twice for very serious imprecision) |
| ERA+ PDE5i                          | Moderate (imprecision)          | High                              | Low (imprecision)                | High (favoring combo)                                                        |
| Selexipag                           | -                               | -                                 | Low (imprecision)                | Very low (favoring ERA; very serious imprecision)                            |



# CHEST<sup>®</sup> Online Supplement

| <b>Compared with PDE5i</b>                 |                        |      |                                     |                                                     |
|--------------------------------------------|------------------------|------|-------------------------------------|-----------------------------------------------------|
| PO/ INH Prostacyclins                      | -                      | -    | Low                                 | Low (favors PDE5i)                                  |
| IV/ SC Prostacyclins                       | -                      | -    | Low                                 | -                                                   |
| Riociguat                                  | -                      | -    | Low (favors PDE5i)                  | Very low (favoring Rioci, very serious imprecision) |
| ERA+ PDE5i                                 | Moderate (imprecision) | High | Low (very serious imprecision)      | Moderate (imprecision)                              |
| Selexipag                                  | -                      | -    | Very low (very serious imprecision) | Low (favors PDE5i; imprecision)                     |
| <b>Compared with PO/ INH Prostacyclins</b> |                        |      |                                     |                                                     |
| IV/ SC Prostacyclins                       | -                      | -    | Low                                 | -                                                   |
| Riociguat                                  | -                      | -    | Low                                 | Low                                                 |
| ERA+ PDE5i                                 | -                      | -    | -                                   | -                                                   |
| Selexipag                                  | -                      | -    | Very low (very serious imprecision) | Very low (favors PCAs; very serious imprecision)    |
| <b>Compared with IV/ SC Prostacyclins</b>  |                        |      |                                     |                                                     |
| Riociguat                                  | -                      | -    | Low (favors PC)                     | -                                                   |
| ERA+ PDE5i                                 | -                      | -    | -                                   | -                                                   |
| Selexipag                                  | -                      | -    | Moderate (favors PC)                | -                                                   |
| <b>Compared with Riociguat</b>             |                        |      |                                     |                                                     |
| ERA+ PDE5i                                 | -                      | -    | -                                   | -                                                   |
| Selexipag                                  | -                      | -    | Very low (very serious imprecision) | Low (favors Riociguat, imprecision)                 |
| <b>Compared with ERA + PDE5i</b>           |                        |      |                                     |                                                     |
| Selexipag                                  | -                      | -    | -                                   | -                                                   |

**e-Figure 1(A-F):** Network diagrams for all study outcomes.

**A: Clinical worsening**

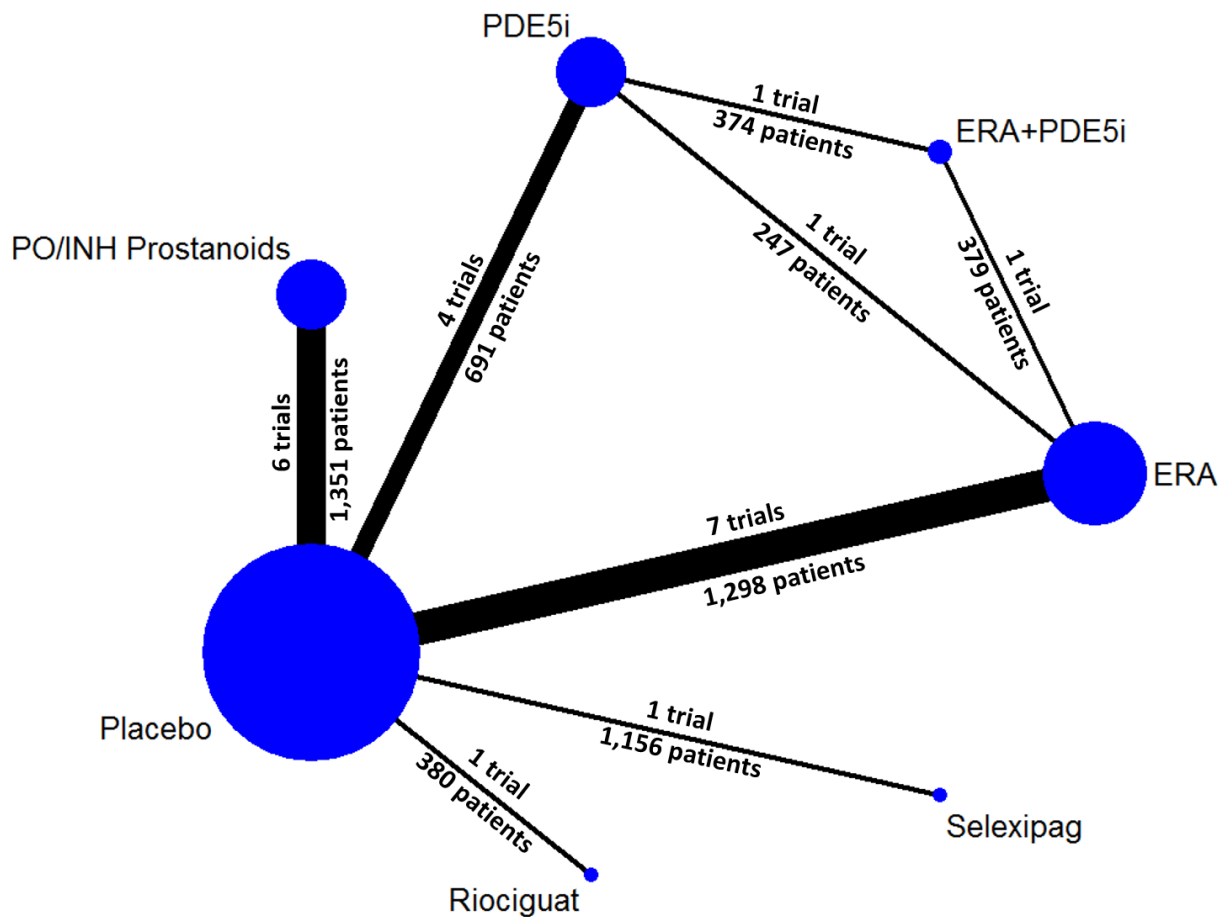



**B: PAH – related hospitalization**

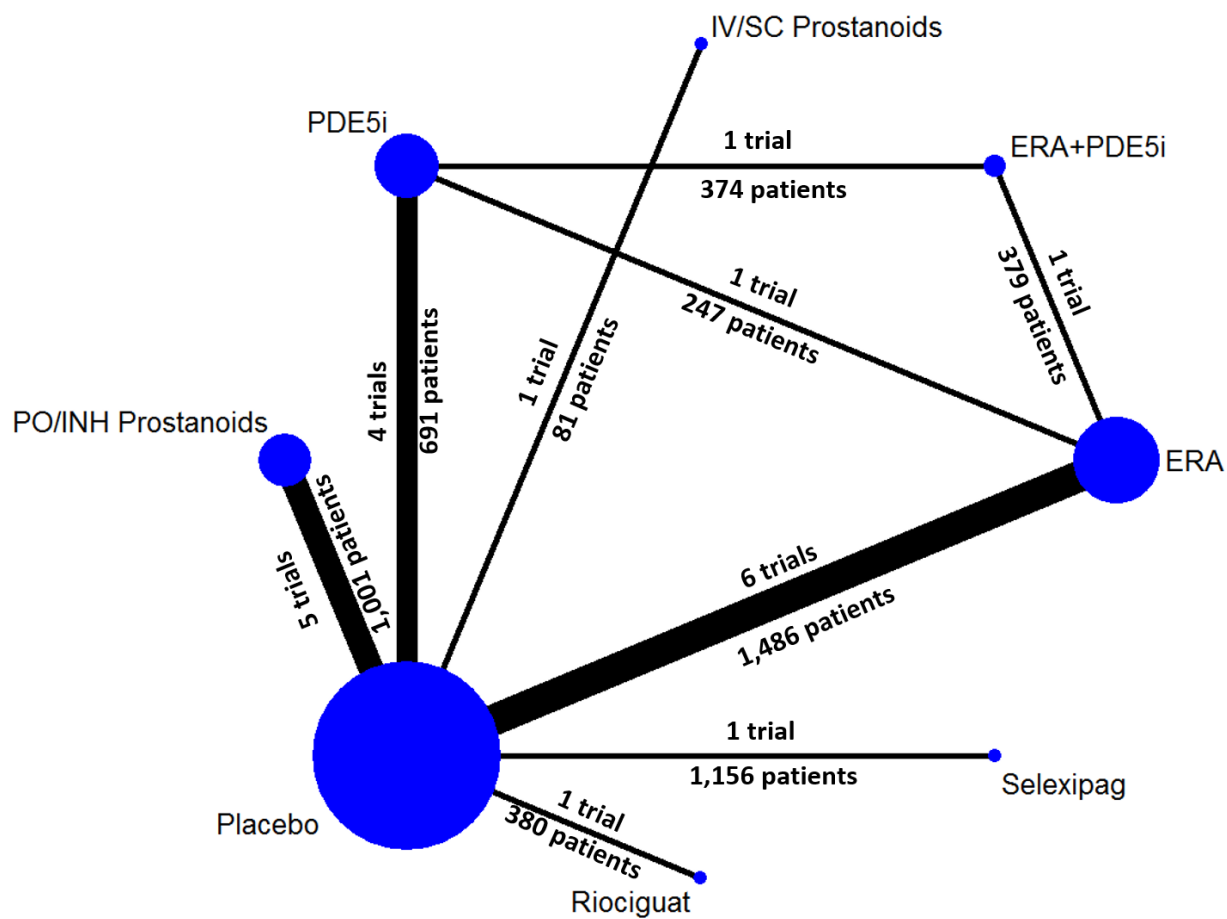

**C: Mortality**

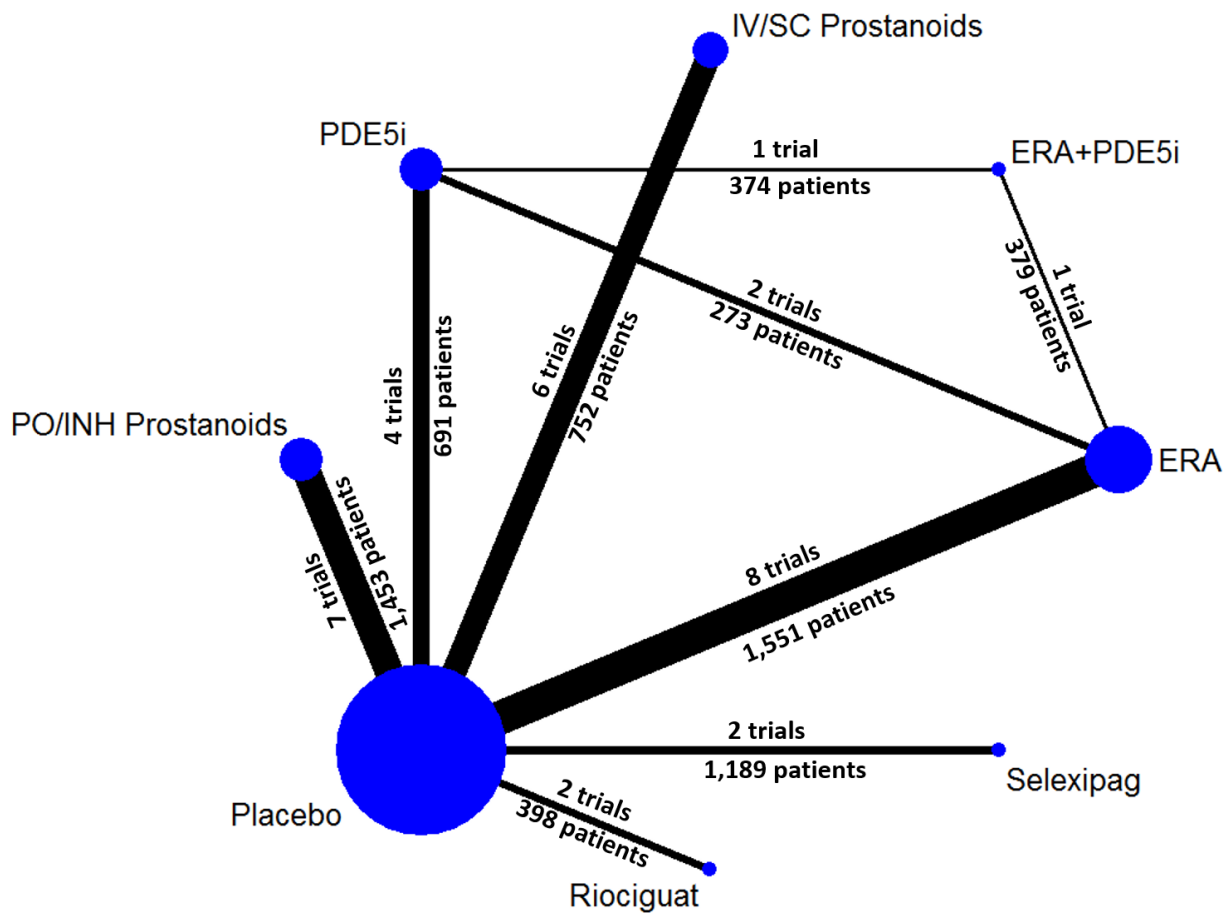

## D: Functional class

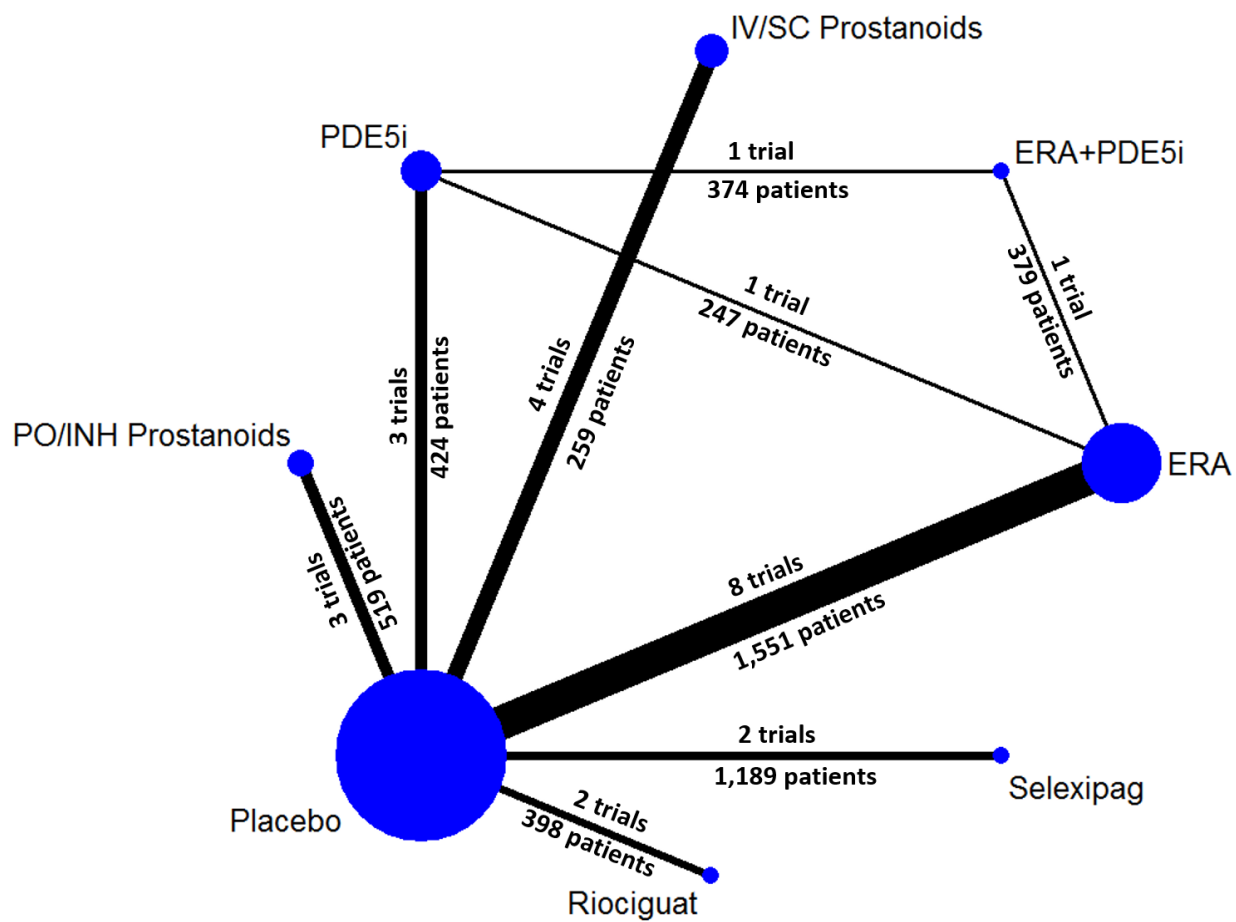

## E: 6-minute walk distance

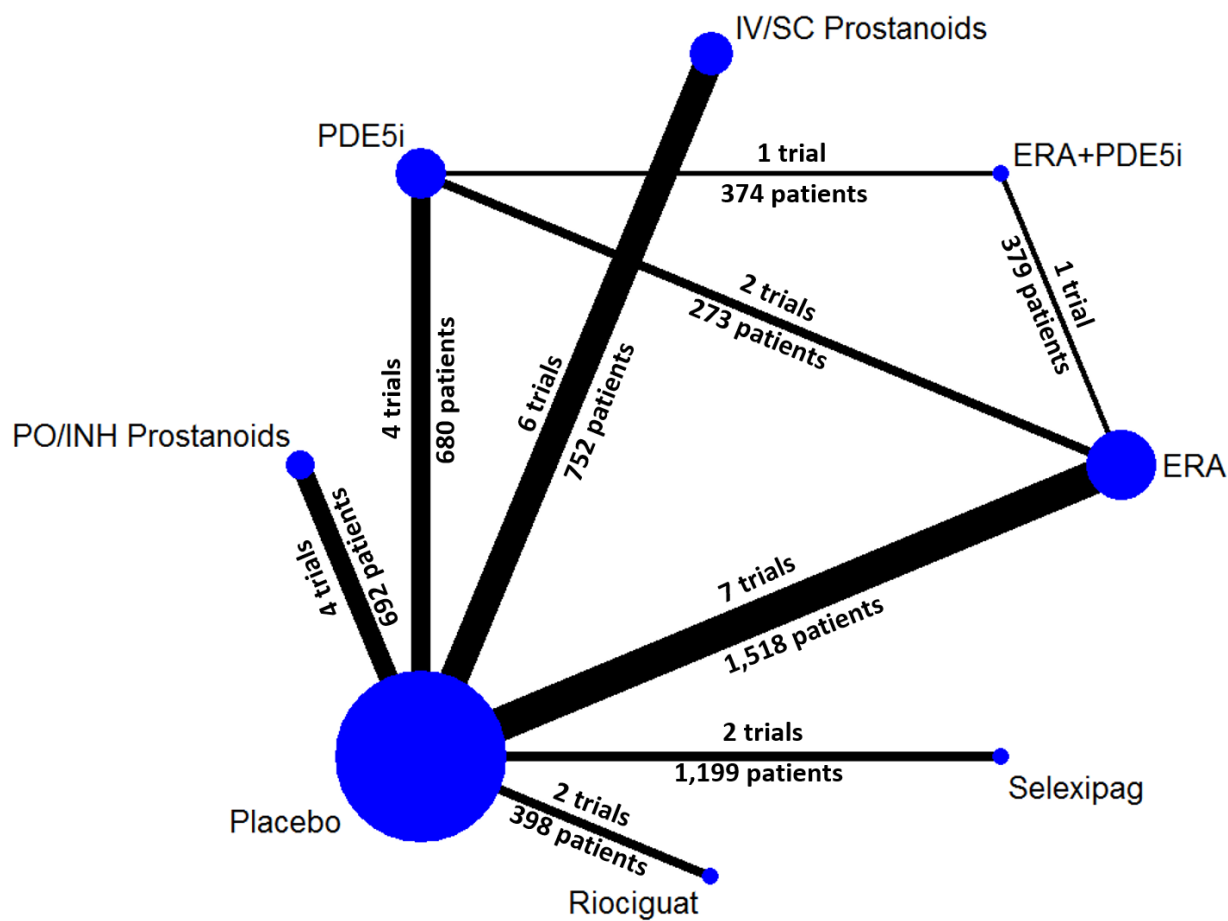

**F: Adverse events leading to discontinuation**

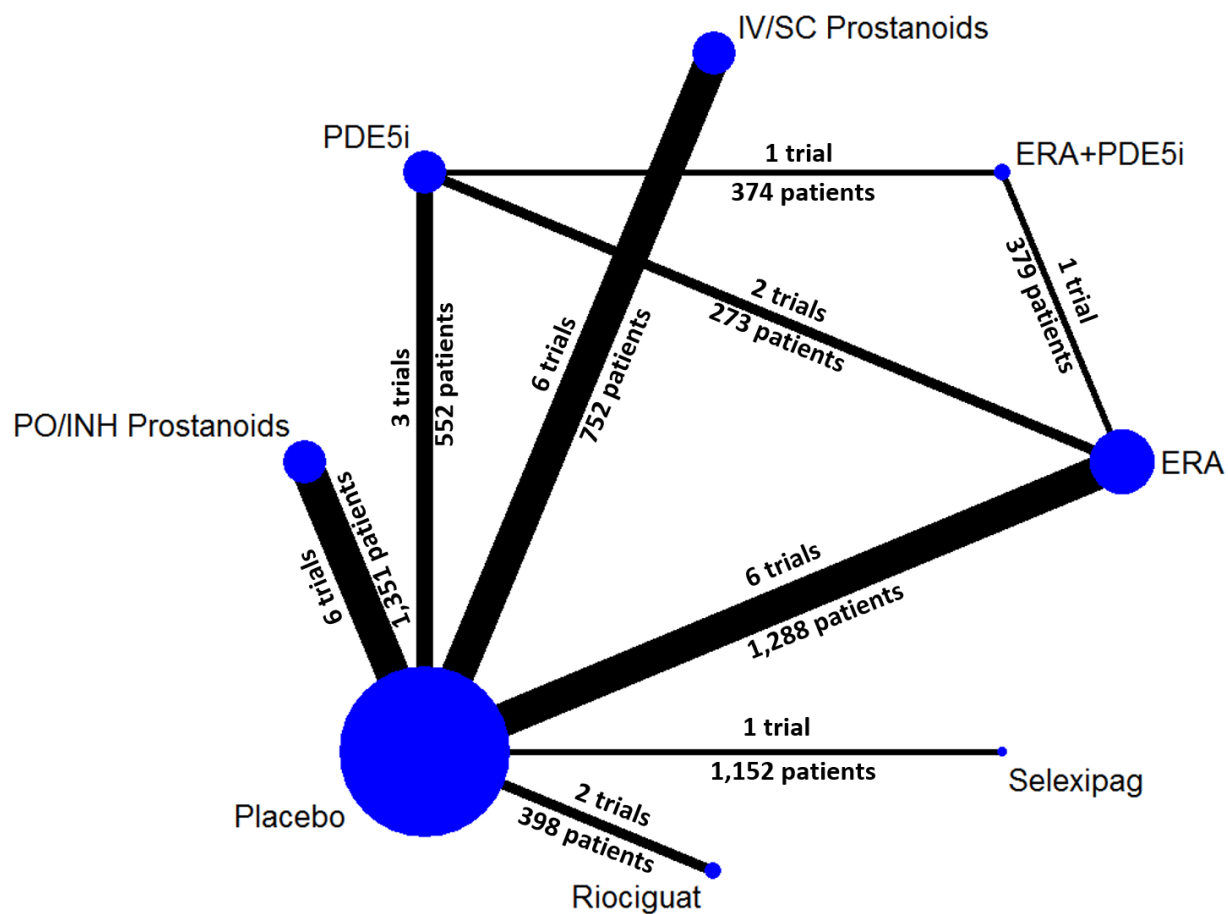

**e-Figure 2A. Risk of bias summary for all studies**

|                             | Random sequence generation (selection bias) | Allocation concealment (selection bias) | Blinding of participants and personnel (performance bias) | Blinding of outcome assessment (detection bias) | Incomplete outcome data (attrition bias) | Selective reporting (reporting bias) | Other bias |
|-----------------------------|---------------------------------------------|-----------------------------------------|-----------------------------------------------------------|-------------------------------------------------|------------------------------------------|--------------------------------------|------------|
| Badesch 2000                | +                                           | +                                       | +                                                         | +                                               | +                                        | +                                    | +          |
| Barst 1996                  | +                                           | +                                       | +                                                         | +                                               | +                                        | +                                    | +          |
| Channick 2001               | +                                           | +                                       | +                                                         | +                                               | +                                        | +                                    | +          |
| Galie 2005 (SUPER)          | +                                           | +                                       | +                                                         | +                                               | +                                        | +                                    | +          |
| Galie 2008 (ARIES1)         | +                                           | +                                       | +                                                         | +                                               | +                                        | +                                    | +          |
| Galie 2008 (ARIES-2)        | +                                           | +                                       | +                                                         | +                                               | +                                        | +                                    | +          |
| Galie 2008 (EARLY)          | +                                           | +                                       | +                                                         | +                                               | +                                        | +                                    | +          |
| Galie 2009 (PHIRST)         | +                                           | +                                       | +                                                         | ?                                               | +                                        | +                                    | +          |
| Galie 2015 (AMBITION)       | +                                           | +                                       | +                                                         | +                                               | +                                        | +                                    | +          |
| Galie 2015 (PATENT PLUS)    | +                                           | +                                       | +                                                         | +                                               | +                                        | +                                    | +          |
| Ghofrani 2013 (PATENT-1)    | +                                           | +                                       | +                                                         | +                                               | +                                        | +                                    | +          |
| Hiremath 2010 (TRUST-1)     | +                                           | +                                       | +                                                         | +                                               | +                                        | +                                    | +          |
| Hoepfer 2006 (COMBI)        | +                                           | +                                       | +                                                         | +                                               | +                                        | +                                    | +          |
| Humbert 2004 (BREATHE-2)    | +                                           | +                                       | +                                                         | +                                               | +                                        | +                                    | +          |
| Jing 2013 (FREEDOM-M)       | +                                           | +                                       | +                                                         | +                                               | +                                        | +                                    | +          |
| McLaughlin 2003             | ?                                           | ?                                       | +                                                         | +                                               | +                                        | ?                                    | +          |
| McLaughlin 2006 (STEP)      | +                                           | +                                       | +                                                         | +                                               | +                                        | +                                    | +          |
| McLaughlin 2010 (TRIUMPH-1) | +                                           | +                                       | +                                                         | +                                               | +                                        | +                                    | +          |
| McLaughlin 2015 (COMPASS-2) | +                                           | ?                                       | +                                                         | +                                               | +                                        | +                                    | +          |
| Olschewski 2002 (AIR)       | +                                           | +                                       | +                                                         | +                                               | +                                        | +                                    | +          |
| Pulido 2013 (SERAPHIN)      | +                                           | +                                       | +                                                         | +                                               | +                                        | +                                    | +          |
| Rubin 1990                  | +                                           | +                                       | +                                                         | +                                               | +                                        | +                                    | +          |
| Rubin 2002 (BREATHE-1)      | +                                           | +                                       | +                                                         | +                                               | +                                        | +                                    | +          |
| Simonneau 2002              | +                                           | +                                       | +                                                         | +                                               | +                                        | +                                    | +          |
| Simonneau 2008 (PACES)      | +                                           | +                                       | +                                                         | +                                               | +                                        | +                                    | +          |
| Simonneau 2012              | +                                           | ?                                       | +                                                         | +                                               | +                                        | +                                    | +          |
| Sitbon 2015 (GRIPHON)       | +                                           | +                                       | +                                                         | +                                               | +                                        | +                                    | +          |
| Tapson 2012 (FREEDOM-C)     | +                                           | +                                       | +                                                         | +                                               | +                                        | +                                    | +          |
| Tapson 2013 (FREEDOM-C2)    | +                                           | +                                       | +                                                         | +                                               | +                                        | +                                    | +          |
| Wilkins 2005 (SERAPH)       | +                                           | +                                       | +                                                         | +                                               | +                                        | +                                    | +          |
| Zhuang 2014                 | +                                           | ?                                       | +                                                         | ?                                               | +                                        | +                                    | +          |

**e-Figure 2B. Risk of bias - overall**

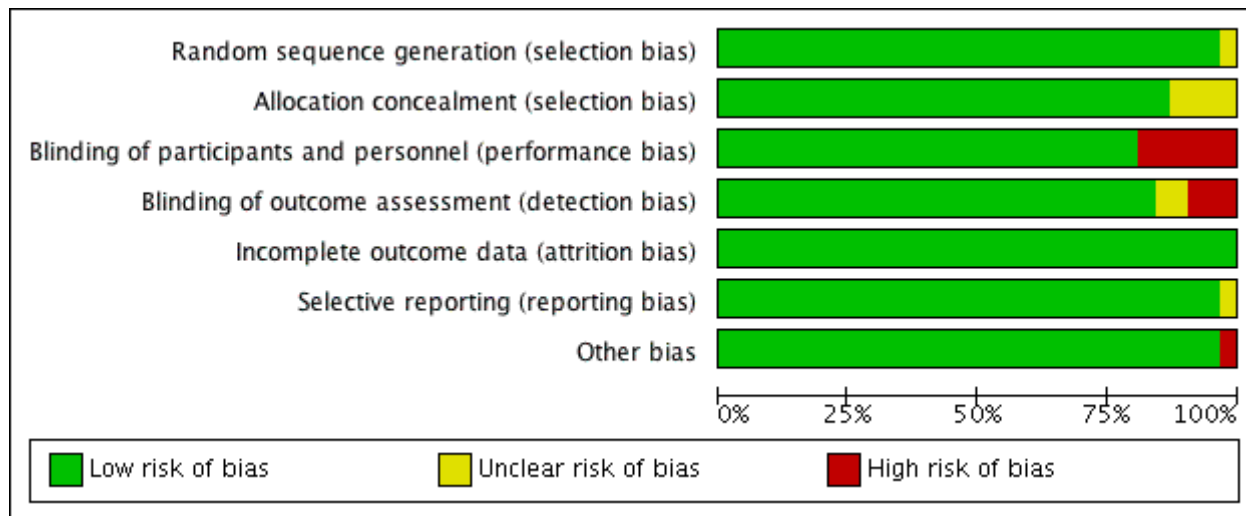

**e-Figure 3. Results of Direct Meta-Analysis for Clinical Worsening**

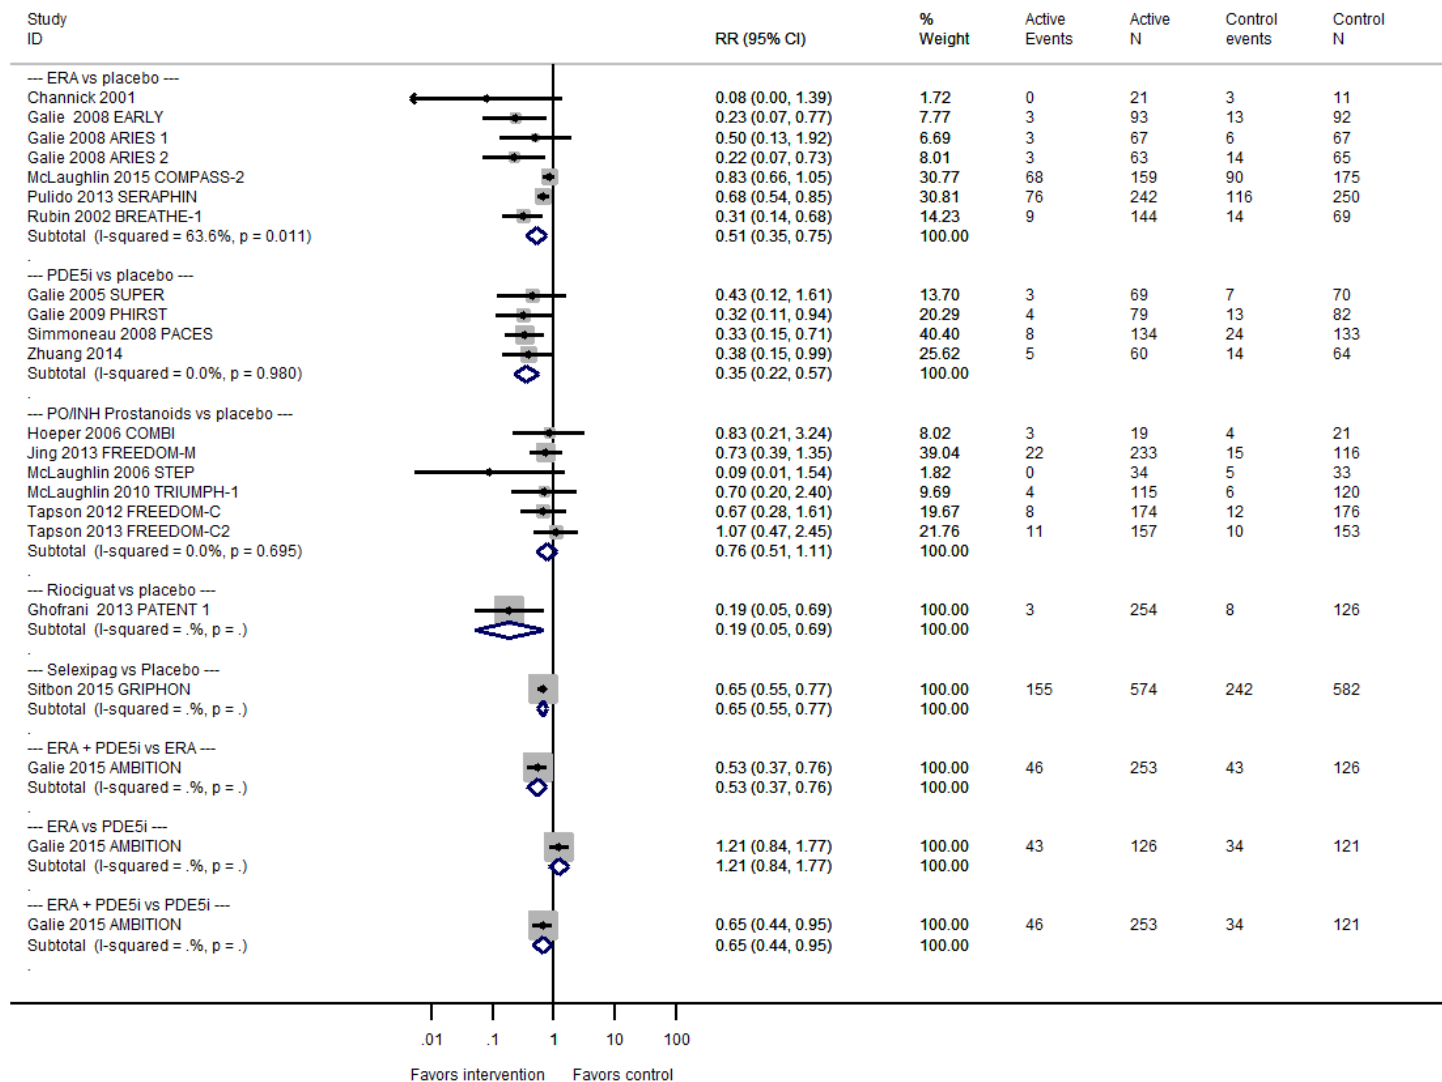



**e- Figure 4. Results of Direct Meta-Analysis for PAH-related hospitalization**

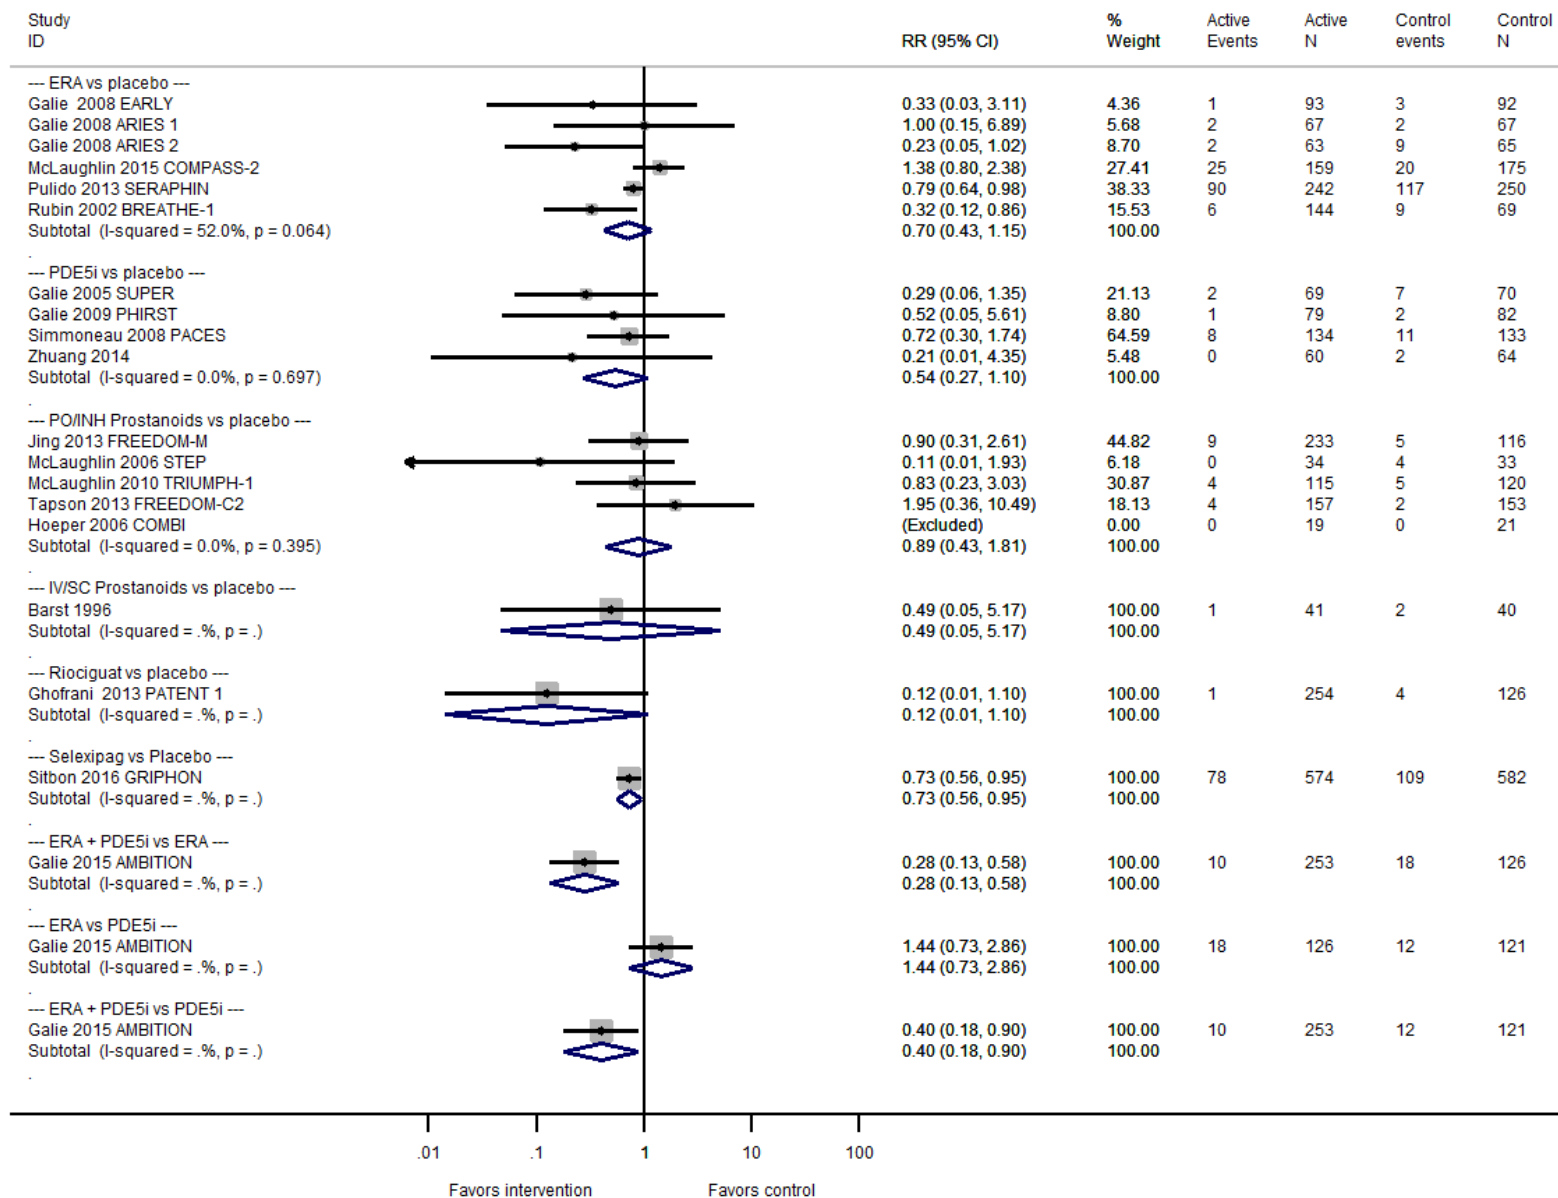

**e- Figure 5. Results of Direct Meta-Analysis for All Cause Mortality**

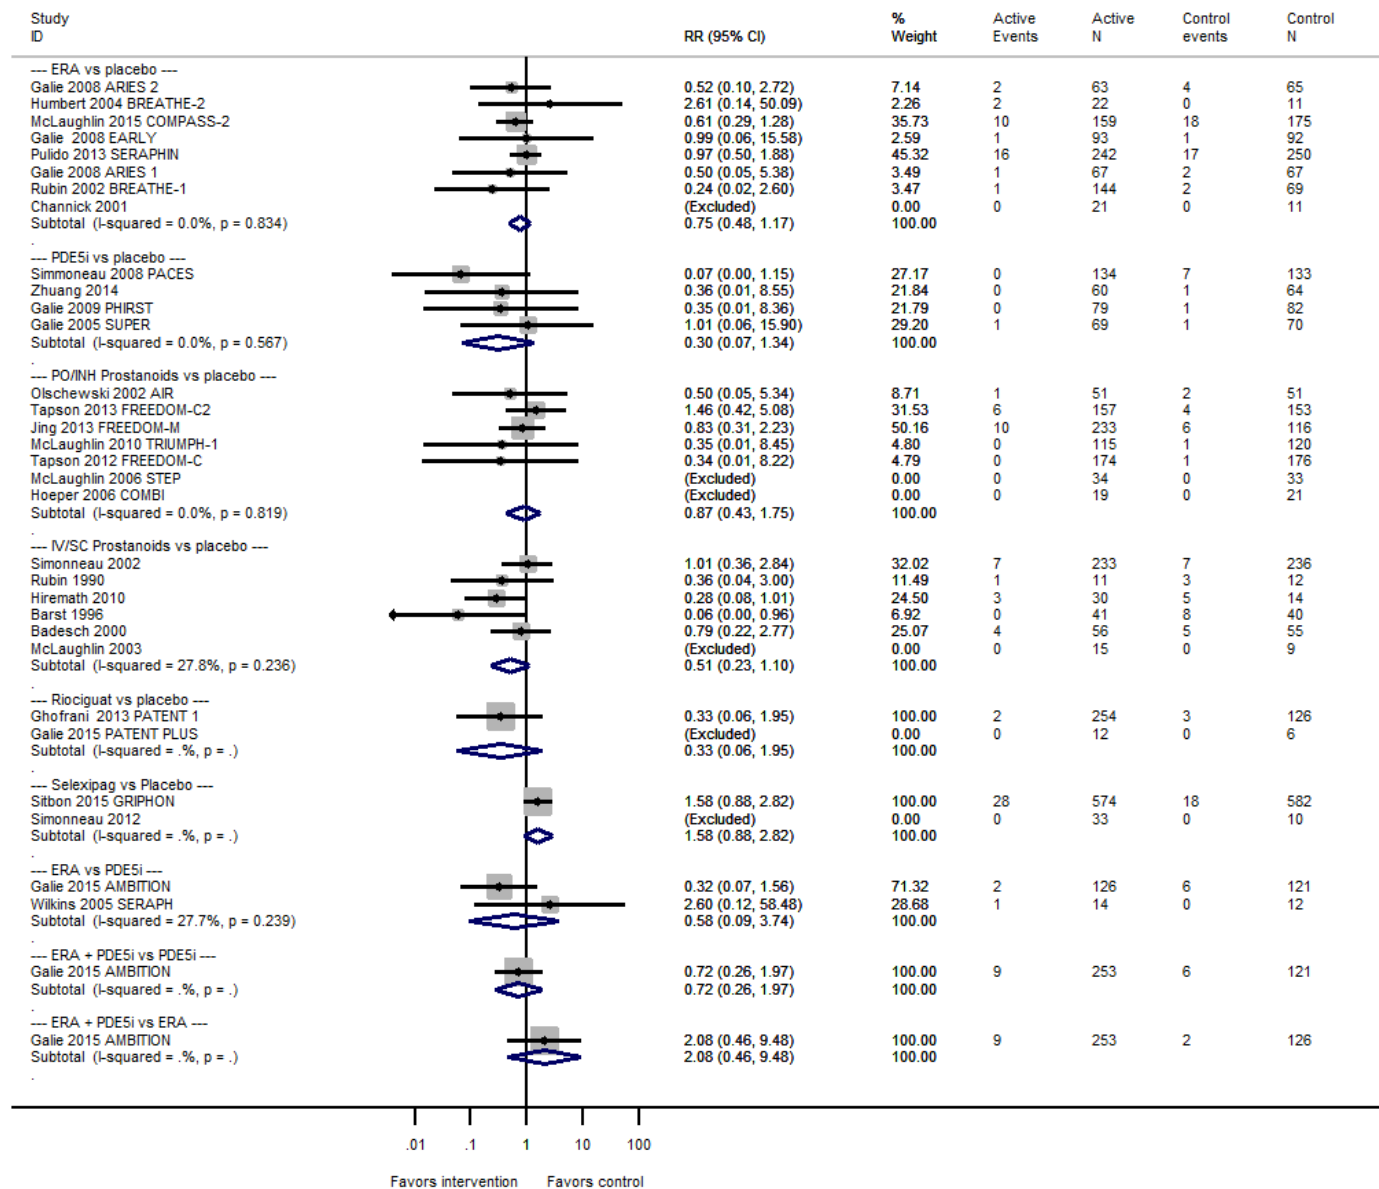

**e-Figure 6. Results of Direct Meta-Analysis for Improvement in Functional Class**

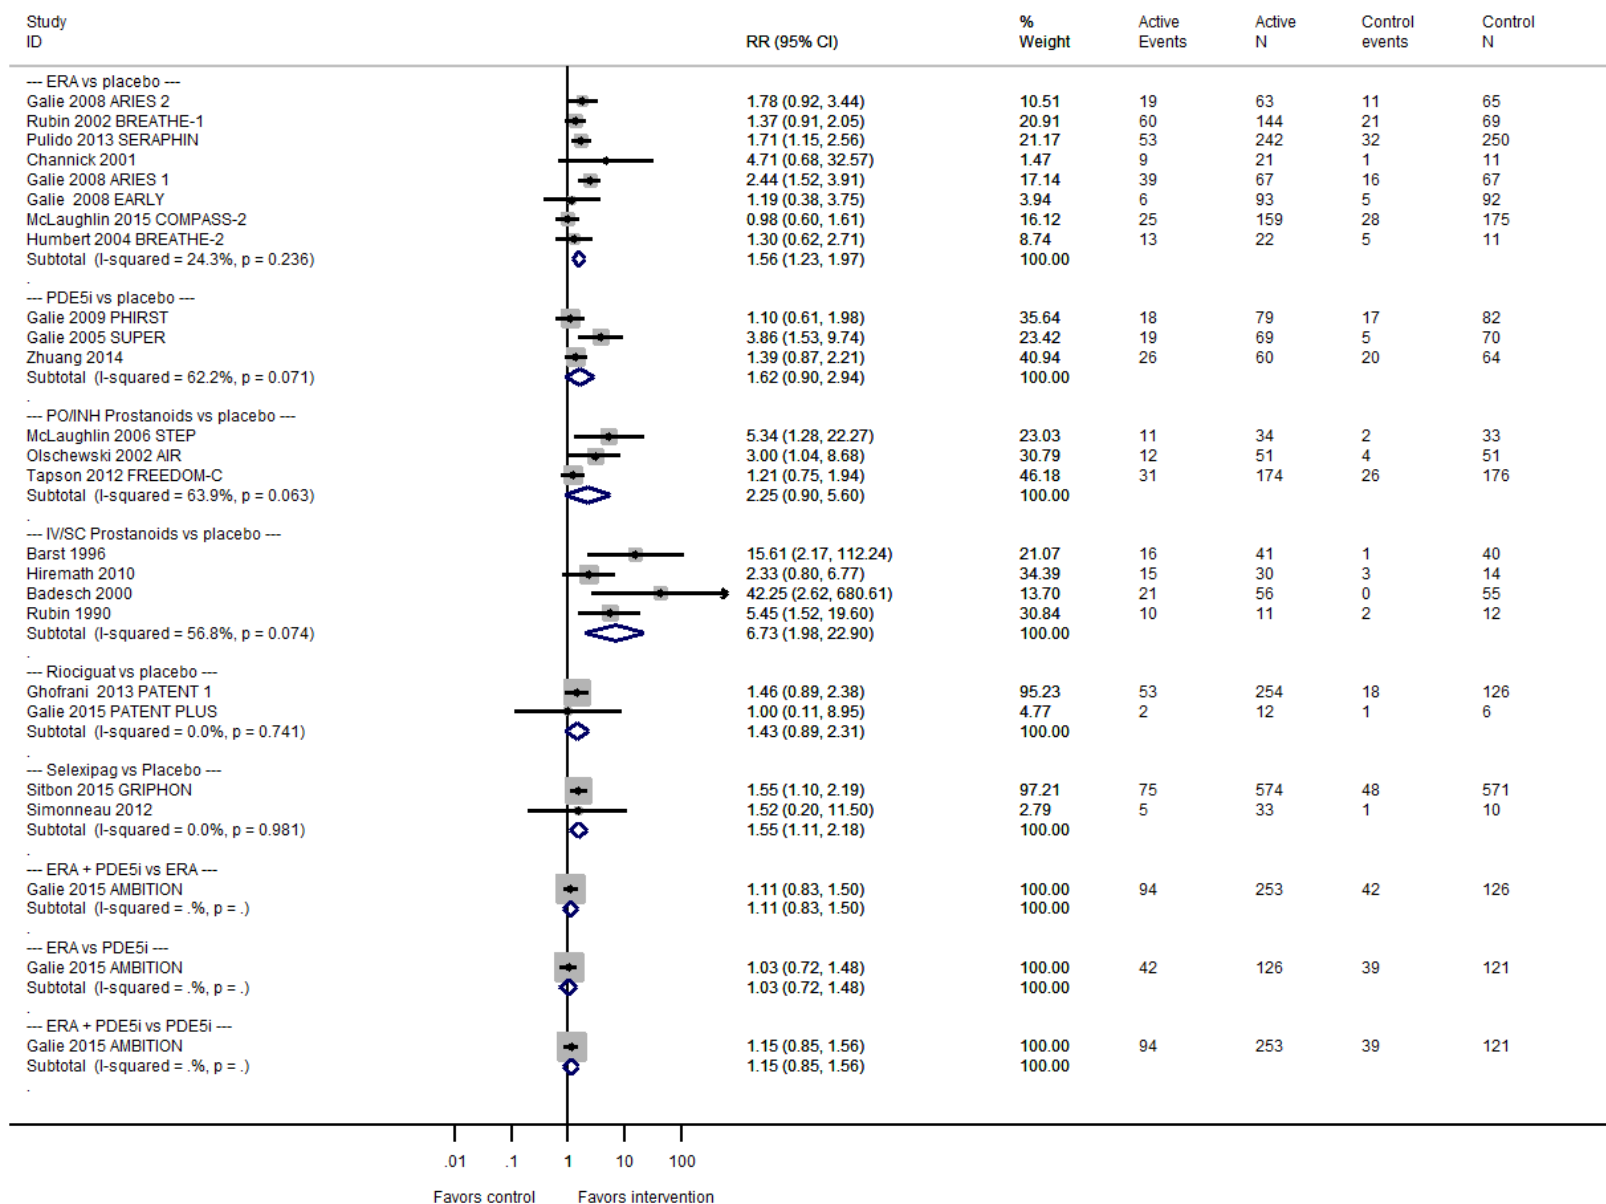

**e-Figure 7. Results of Direct Meta-Analysis for Improvement in 6MWD. The red line represents the minimal clinically important difference (MCID) of 33 m.**

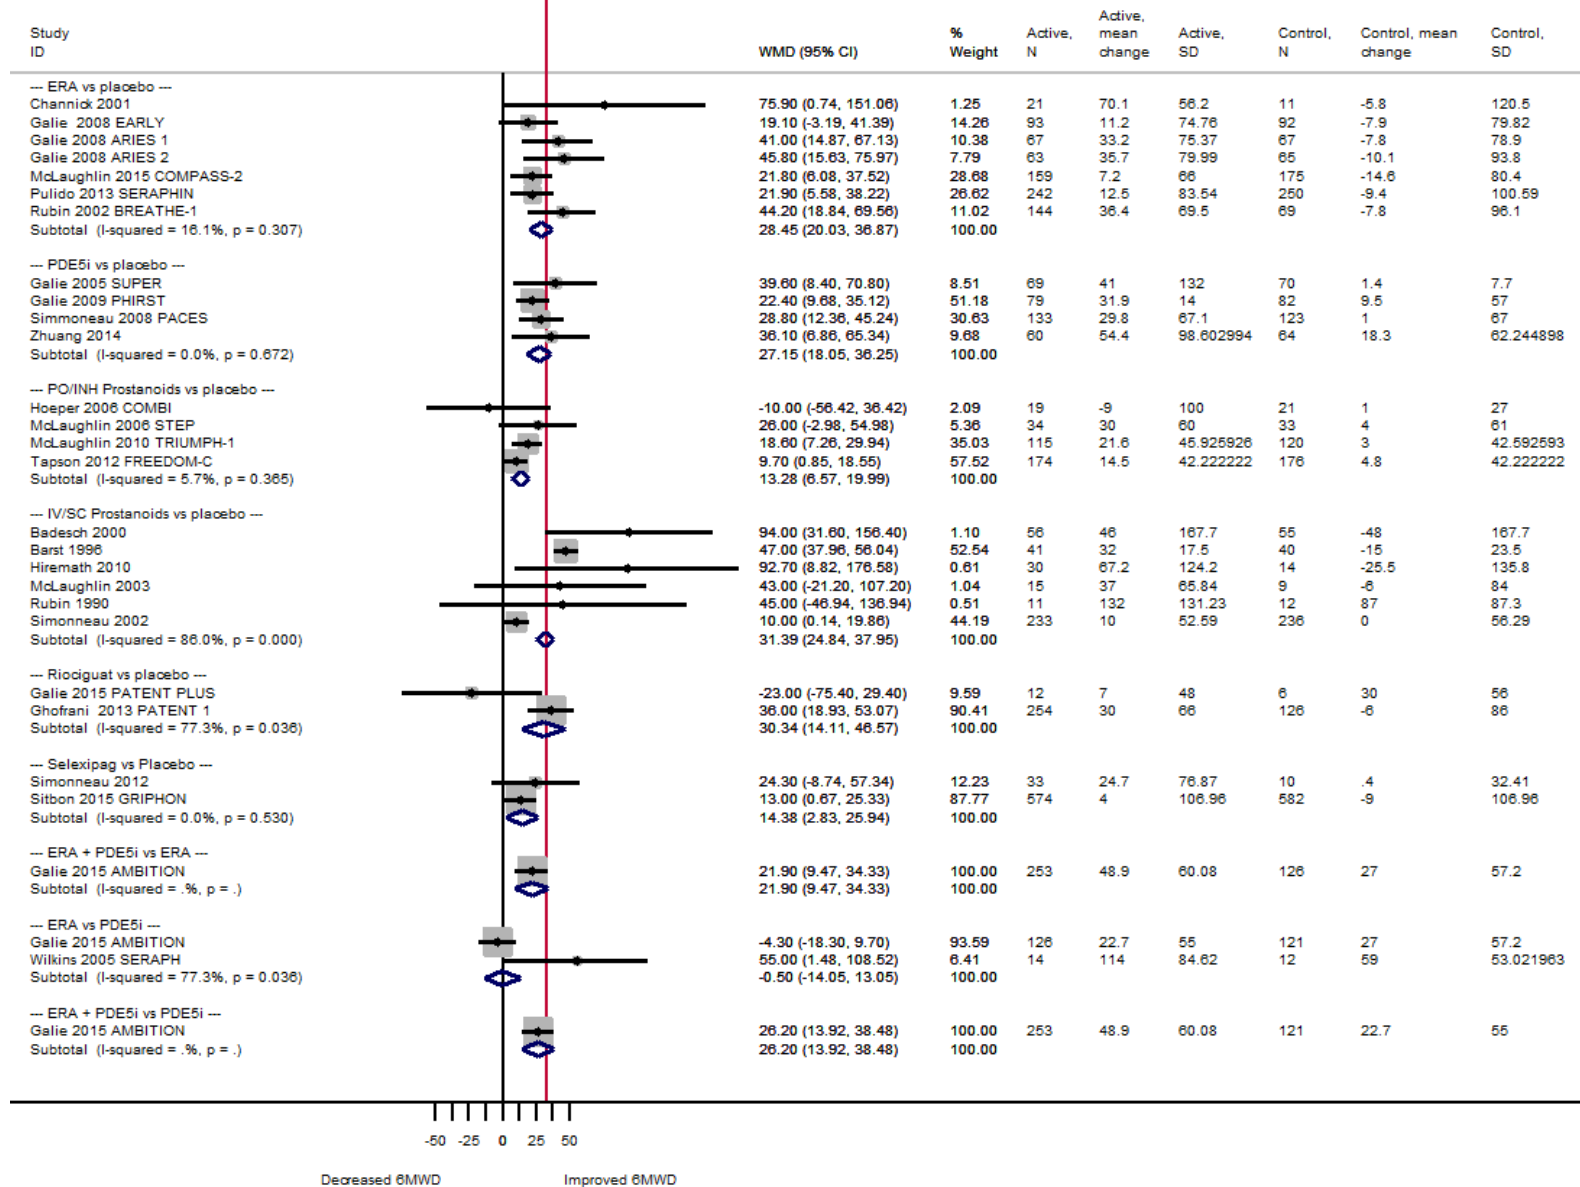

**e-Figure 8. Results of Direct Meta-Analysis for adverse events leading to drug discontinuation**

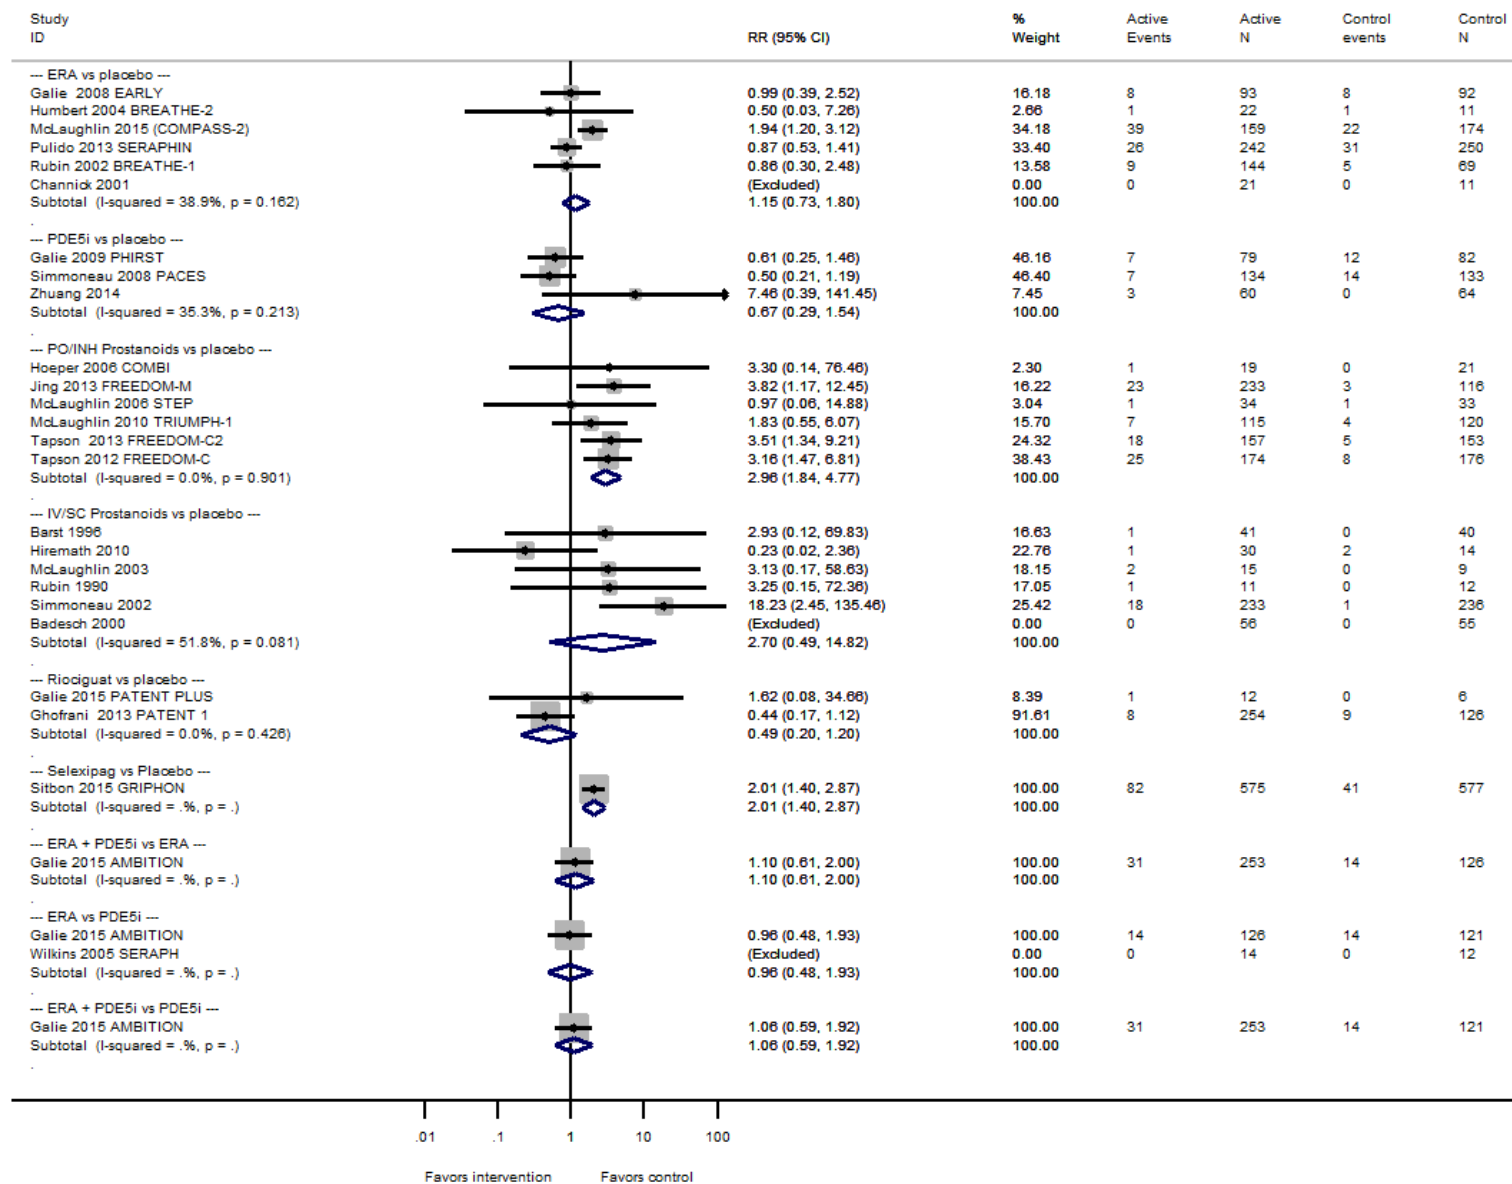

e-Figure 9. Funnel plot to assess for publication bias

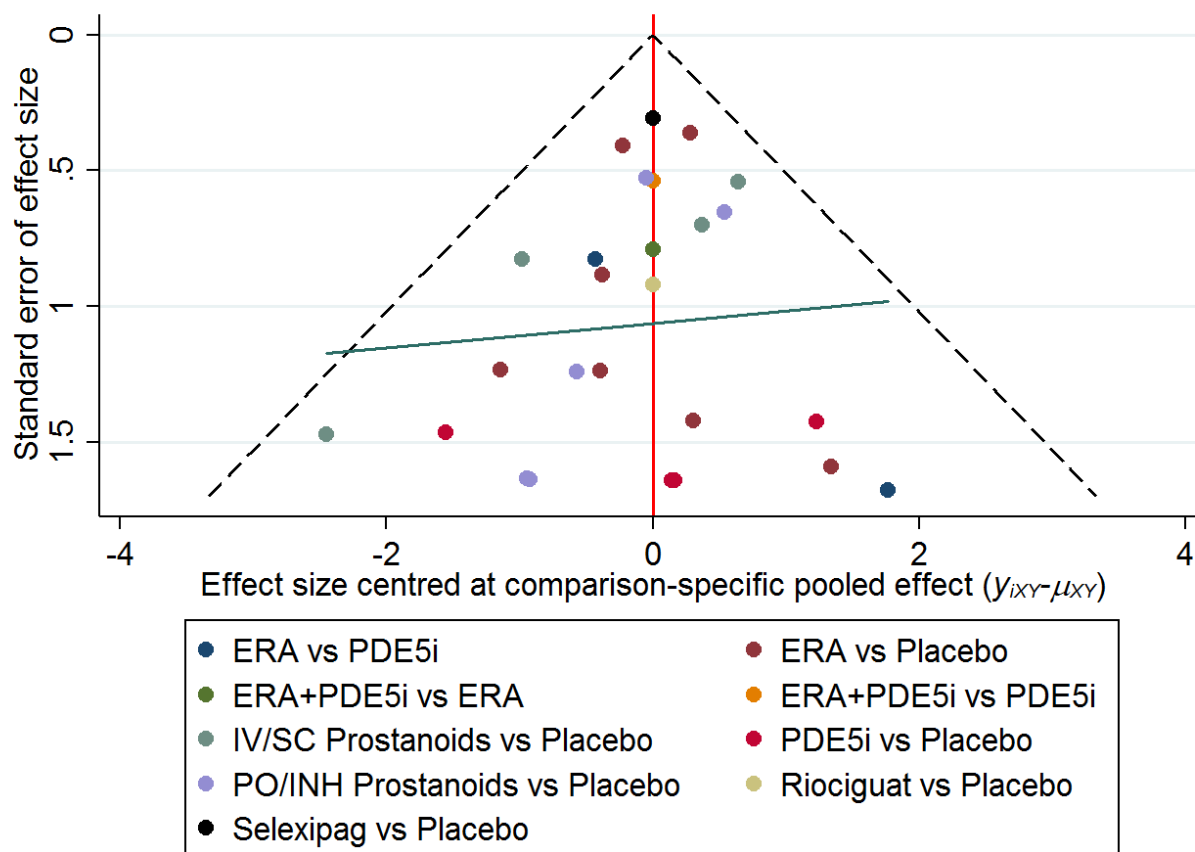

Funnel plot of trials of pulmonary arterial hypertension (mortality outcome since all trial reported this outcome). There is no evidence for funnel plot asymmetry, however, number of pairwise treatments for each comparison is small.

**References:**

1. Fukumoto Y, Yamada N, Matsubara H, et al. Double-blind, placebo-controlled clinical trial with a rho-kinase inhibitor in pulmonary arterial hypertension. *Circ J*. 2013;77(10):2619-2625.
2. Hoeper MM, Barst RJ, Bourge RC, et al. Imatinib mesylate as add-on therapy for pulmonary arterial hypertension: results of the randomized IMPRES study. *Circulation*. 2013;127(10):1128-1138.
3. Sandoval J, Torbicki A, Souza R, et al. Safety and efficacy of sitaxsentan 50 and 100 mg in patients with pulmonary arterial hypertension. *Pulm Pharmacol Ther*. 2012;25(1):33-39.
4. Zeng WJ, Xiong CM, Zhao L, et al. Atorvastatin in pulmonary arterial hypertension (APATH) study. *Eur Respir J*. 2012;40(1):67-74.
5. Kawut SM, Bagiella E, Lederer DJ, et al. Randomized clinical trial of aspirin and simvastatin for pulmonary arterial hypertension: ASA-STAT. *Circulation*. 2011;123(25):2985-2993.
6. Ghofrani HA, Morrell NW, Hoeper MM, et al. Imatinib in pulmonary arterial hypertension patients with inadequate response to established therapy. *Am J Respir Crit Care Med*. 2010;182(9):1171-1177.
7. Wang XX, Zhang FR, Shang YP, et al. Transplantation of autologous endothelial progenitor cells may be beneficial in patients with idiopathic pulmonary arterial hypertension: a pilot randomized controlled trial. *J Am Coll Cardiol*. 2007;49(14):1566-1571.
8. Barst RJ, Langleben D, Badesch D, et al. Treatment of pulmonary arterial hypertension with the selective endothelin-A receptor antagonist sitaxsentan. *J Am Coll Cardiol*. 2006;47(10):2049-2056.
9. Barst RJ, Langleben D, Frost A, et al. Sitaxsentan therapy for pulmonary arterial hypertension. *Am J Respir Crit Care Med*. 2004;169(4):441-447.
10. Barst RJ, McGoon M, McLaughlin V, et al. Beraprost therapy for pulmonary arterial hypertension. *J Am Coll Cardiol*. 2003;41(12):2119-2125.
11. Galie N, Humbert M, Vachiery JL, et al. Effects of beraprost sodium, an oral prostacyclin analogue, in patients with pulmonary arterial hypertension: a randomized, double-blind, placebo-controlled trial. *J Am Coll Cardiol*. 2002;39(9):1496-1502.
12. Wilkins MR, Ali O, Bradlow W, et al. Simvastatin as a treatment for pulmonary hypertension trial. *Am J Respir Crit Care Med*. 2010;181(10):1106-1113.
13. Cha KS, Cho KI, Seo JS, et al. Effects of inhaled iloprost on exercise capacity, quality of life, and cardiac function in patients with pulmonary arterial hypertension secondary to congenital heart disease (the Eisenmenger syndrome) (from the EIGER Study). *Am J Cardiol*. 2013;112(11):1834-1839.
14. Kaya MG, Lam YY, Erer B, et al. Long-term effect of bosentan therapy on cardiac function and symptomatic benefits in adult patients with Eisenmenger syndrome. *J Card Fail*. 2012;18(5):379-384.
15. Mukhopadhyay S, Nathani S, Yusuf J, Shrimal D, Tyagi S. Clinical efficacy of phosphodiesterase-5 inhibitor tadalafil in Eisenmenger syndrome--a randomized, placebo-controlled, double-blind crossover study. *Congenit Heart Dis*. 2011;6(5):424-431.
16. Iversen K, Jensen AS, Jensen TV, Vejlstrop NG, Sondergaard L. Combination therapy with bosentan and sildenafil in Eisenmenger syndrome: a randomized, placebo-controlled, double-blinded trial. *Eur Heart J*. 2010;31(9):1124-1131.
17. Bharani A, Patel A, Saraf J, Jain A, Mehrotra S, Lunia B. Efficacy and safety of PDE-5 inhibitor tadalafil in pulmonary arterial hypertension. *Indian Heart J*. 2007;59(4):323-328.
18. Chau EM, Fan KY, Chow WH. Effects of chronic sildenafil in patients with Eisenmenger syndrome versus idiopathic pulmonary arterial hypertension. *Int J Cardiol*. 2007;120(3):301-305.
19. Galie N, Beghetti M, Gatzoulis MA, et al. Bosentan therapy in patients with Eisenmenger syndrome: a multicenter, double-blind, randomized, placebo-controlled study. *Circulation*. 2006;114(1):48-54.

20. Van De Bruaene A, Jansen K, De Meester P, et al. Bosentan for mild pulmonary vascular disease in ASD patients (the BOMPA trial): a double-blind, randomized controlled, pilot trial. *Int J Cardiol.* 2013;168(5):5081-5082.
21. Barst RJ, Mubarak KK, Machado RF, et al. Exercise capacity and haemodynamics in patients with sickle cell disease with pulmonary hypertension treated with bosentan: results of the ASSET studies. *Br J Haematol.* 2010;149(3):426-435.
22. Barst RJ, Ivy DD, Gaitan G, et al. A randomized, double-blind, placebo-controlled, dose-ranging study of oral sildenafil citrate in treatment-naive children with pulmonary arterial hypertension. *Circulation.* 2012;125(2):324-334.
23. Sun X, Wang K, Wang W, Li B. [Clinical study on sildenafil in treatment of pregnant women with pulmonary arterial hypertension]. *Zhonghua Fu Chan Ke Za Zhi.* 2014;49(6):414-418.
24. Badesch DB, Feldman J, Keogh A, et al. ARIES-3: ambrisentan therapy in a diverse population of patients with pulmonary hypertension. *Cardiovasc Ther.* 2012;30(2):93-99.
25. Ghofrani HA, Wiedemann R, Rose F, et al. Combination therapy with oral sildenafil and inhaled iloprost for severe pulmonary hypertension. *Ann Intern Med.* 2002;136(7):515-522.
26. Chin KM, Badesch DB, Robbins IM, et al. Two formulations of epoprostenol sodium in the treatment of pulmonary arterial hypertension: EPITOME-1 (epoprostenol for injection in pulmonary arterial hypertension), a phase IV, open-label, randomized study. *Am Heart J.* 2014;167(2):218-225 e211.
27. Channick RN, Olschewski H, Seeger W, Staub T, Voswinckel R, Rubin LJ. Safety and efficacy of inhaled treprostinil as add-on therapy to bosentan in pulmonary arterial hypertension. *J Am Coll Cardiol.* 2006;48(7):1433-1437.
28. Rubenfire M, McLaughlin VV, Allen RP, et al. Transition from IV epoprostenol to subcutaneous treprostinil in pulmonary arterial hypertension: a controlled trial. *Chest.* 2007;132(3):757-763.
29. White IR, Barrett JK, Jackson D, Higgins JPT. Consistency and inconsistency in network meta-analysis: model estimation using multivariate meta-regression. *Research Synthesis Methods.* 2012;3(2):111-125.
30. Higgins JP, Jackson D, Barrett JK, Lu G, Ades AE, White IR. Consistency and inconsistency in network meta-analysis: concepts and models for multi-arm studies. *Res Synth Methods.* 2012;3(2):98-110.
31. White IR, Barrett JK, Jackson D, Higgins J. Consistency and inconsistency in network meta-analysis: model estimation using multivariate meta-regression. *Research Synthesis Methods.* 2012;3(2):111-125.
32. Salanti G, Ades AE, Ioannidis JP. Graphical methods and numerical summaries for presenting results from multiple-treatment meta-analysis: an overview and tutorial. *J Clin Epidemiol.* 2011;64(2):163-171.
33. Trinquart L, Attiche N, Bafeta A, Porcher R, Ravaud P. Uncertainty in Treatment Rankings: Reanalysis of Network Meta-analyses of Randomized Trials. *Ann Intern Med.* 2016;164(10):666-673.
34. Hoeper MM, McLaughlin VV, Dalaan AM, Satoh T, Galie N. Treatment of pulmonary hypertension. *Lancet Respir Med.* 2016.
35. Singh TP, Rohit M, Grover A, Malhotra S, Vijayvergiya R. A randomized, placebo-controlled, double-blind, crossover study to evaluate the efficacy of oral sildenafil therapy in severe pulmonary artery hypertension. *Am Heart J.* 2006;151(4):851 e851-855.
36. Sastry BK, Narasimhan C, Reddy NK, Raju BS. Clinical efficacy of sildenafil in primary pulmonary hypertension: a randomized, placebo-controlled, double-blind, crossover study. *J Am Coll Cardiol.* 2004;43(7):1149-1153.
